# Supplementary material for: Interactions of Si+(2PJ) and Ge+ (2PJ) with rare gas atoms (He–Rn): interaction potentials, spectroscopy, and ion transport coefficients
Source: Royal Society of Chemistry journal article supplement (doi:10.1039/d1cp05710c), 2022-01-01
Supplement: d1cp05710c1.xlsx [file d1cp05710c1.xlsx]

## Sheet: Ge+-He
Ge+-He extrapolated basis set (EBS) potentials using RCCSD(T) calculations
Energies in Hartree
	R / Ang	2Sig_nonSO	2Pi_nonSO	2Pi1/2	2Pi3/2	2Sig1/2
	0.8	1.44963	1.24017	1.23743	1.2429	1.44964
	0.85	1.18755	0.972956	0.970279	0.97562	1.18756
	0.9	0.981509	0.76596	0.763341	0.768569	0.981519
	0.95	0.820362	0.605285	0.602714	0.607847	0.82037
	1	0.693795	0.480224	0.477694	0.482748	0.693801
	1.1	0.512167	0.306022	0.303481	0.308537	0.512194
	1.2	0.388344	0.198144	0.195587	0.200666	0.388379
	1.3	0.297214	0.130073	0.127487	0.13261	0.297264
	1.4	0.227848	0.0862236	0.0836047	0.0887729	0.227917
	1.5	0.174396	0.0573908	0.0547356	0.0599503	0.174492
	1.6	0.133016	0.03809	0.0353928	0.040659	0.133144
	1.7	0.100979	0.0249993	0.0222523	0.0275775	0.101148
	1.8	0.076246	0.0160567	0.0132507	0.0186437	0.0764651
	1.9	0.0572345	0.00994414	0.00706765	0.0125392	0.0575159
	2	0.0426957	0.00579169	0.00283086	0.00839386	0.0430544
	2.1	0.0316381	0.00300792	-5.40859e-05	0.00561623	0.0320918
	2.2	0.0232752	0.00118106	-0.00200192	0.00379451	0.0238447
	2.3	0.0169865	2.00951e-05	-0.00330592	0.0026378	0.0176948
	2.4	0.0122857	-0.000682188	-0.00417387	0.00193896	0.0131562
	2.5	0.00879373	-0.00107361	-0.00475131	0.00155031	0.00984751
	2.6	0.00621687	-0.00125912	-0.00513728	0.00136699	0.00746891
	2.7	0.00432892	-0.00131247	-0.00539636	0.00131537	0.00578497
	2.8	0.00295658	-0.00128465	-0.00556887	0.00134454	0.0046116
	2.9	0.00196779	-0.00121028	-0.00567973	0.00141996	0.00380699
	3	0.00126247	-0.00111231	-0.0057451	0.00151874	0.00326421
	3.1	0.000765188	-0.00100551	-0.00577659	0.00162616	0.0029046
	3.2	0.000419443	-0.000898986	-0.00578328	0.00173317	0.00267159
	3.3	0.000183161	-0.000798016	-0.00577255	0.0018345	0.00252517
	3.4	2.52525e-05	-0.000705325	-0.00575028	0.00192748	0.00243741
	3.5	-7.70823e-05	-0.000621996	-0.00572104	0.00201102	0.00238895
	3.6	-0.000140441	-0.000548115	-0.00568821	0.00208507	0.00236647
	3.7	-0.000176818	-0.000483206	-0.00565418	0.00215011	0.00236085
	3.8	-0.000194822	-0.000426512	-0.00562058	0.0022069	0.00236584
	3.9	-0.000200579	-0.000377169	-0.00558845	0.00225632	0.00237721
	4	-0.000198407	-0.000334303	-0.00555838	0.00229925	0.00239212
	4.1	-0.00019132	-0.000297082	-0.00553069	0.00233651	0.00240869
	4.2	-0.000181386	-0.000264749	-0.00550547	0.00236889	0.0024257
	4.3	-0.000170007	-0.000236623	-0.00548269	0.00239704	0.00244239
	4.4	-0.000158106	-0.000212111	-0.0054622	0.00242158	0.0024583
	4.5	-0.000146277	-0.000190693	-0.00544386	0.00244302	0.00247318
	4.6	-0.000134883	-0.000171929	-0.00542747	0.0024618	0.00248693
	4.7	-0.000124131	-0.000155441	-0.00541283	0.0024783	0.00249951
	4.8	-0.000114127	-0.000140907	-0.00539976	0.00249285	0.00251097
	4.9	-0.000104907	-0.000128058	-0.00538809	0.00250571	0.00252136
	5	-9.64634e-05	-0.000116666	-0.00537766	0.00251711	0.00253076
	5.1	-8.87647e-05	-0.000106535	-0.00536832	0.00252725	0.00253924
	5.2	-8.1764e-05	-9.75015e-05	-0.00535996	0.00253629	0.0025469
	5.3	-7.54069e-05	-8.94252e-05	-0.00535245	0.00254437	0.00255382
	5.4	-6.96382e-05	-8.21849e-05	-0.00534569	0.00255161	0.00256007
	5.5	-6.44024e-05	-7.56777e-05	-0.00533961	0.00255812	0.00256572
	5.6	-5.96475e-05	-6.98148e-05	-0.00533411	0.00256399	0.00257084
	5.7	-5.53242e-05	-6.45192e-05	-0.00532913	0.00256929	0.00257548
	5.8	-5.13888e-05	-5.97249e-05	-0.00532462	0.00257409	0.0025797
	5.9	-4.78013e-05	-5.53745e-05	-0.00532053	0.00257844	0.00258354
	6	-4.45252e-05	-5.14183e-05	-0.0053168	0.0025824	0.00258704
	6.1	-4.15291e-05	-4.78132e-05	-0.00531339	0.002586	0.00259023
	6.2	-3.87843e-05	-4.45221e-05	-0.00531028	0.0025893	0.00259316
	6.3	-3.62659e-05	-4.15117e-05	-0.00530744	0.00259231	0.00259584
	6.4	-3.39516e-05	-3.87536e-05	-0.00530483	0.00259507	0.0025983
	6.5	-3.18216e-05	-3.62228e-05	-0.00530243	0.0025976	0.00260056
	6.6	-2.98587e-05	-3.38967e-05	-0.00530022	0.00259993	0.00260264
	6.7	-2.80469e-05	-3.17561e-05	-0.00529819	0.00260207	0.00260456
	6.8	-2.63726e-05	-2.97832e-05	-0.00529632	0.00260404	0.00260634
	6.9	-2.48233e-05	-2.79626e-05	-0.00529459	0.00260586	0.00260797
	7	-2.33879e-05	-2.62805e-05	-0.00529299	0.00260755	0.00260949
	7.1	-2.20564e-05	-2.47243e-05	-0.00529151	0.0026091	0.0026109
	7.2	-2.08199e-05	-2.32829e-05	-0.00529013	0.00261055	0.0026122
	7.3	-1.96702e-05	-2.19461e-05	-0.00528886	0.00261188	0.00261341
	7.4	-1.86e-05	-2.07051e-05	-0.00528768	0.00261313	0.00261454
	7.5	-1.76027e-05	-1.95517e-05	-0.00528657	0.00261428	0.00261559
	7.6	-1.66723e-05	-1.84783e-05	-0.00528555	0.00261535	0.00261657
	7.7	-1.58035e-05	-1.74785e-05	-0.00528459	0.00261635	0.00261748
	7.8	-1.49913e-05	-1.65461e-05	-0.0052837	0.00261729	0.00261833
	7.9	-1.42313e-05	-1.56757e-05	-0.00528287	0.00261816	0.00261913
	8	-1.35193e-05	-1.48624e-05	-0.00528209	0.00261897	0.00261987
	8.1	-1.28518e-05	-1.41017e-05	-0.00528136	0.00261973	0.00262057
	8.2	-1.22254e-05	-1.33895e-05	-0.00528067	0.00262044	0.00262123
	8.3	-1.16371e-05	-1.27221e-05	-0.00528003	0.00262111	0.00262184
	8.4	-1.10841e-05	-1.2096e-05	-0.00527943	0.00262174	0.00262242
	8.5	-1.05637e-05	-1.15084e-05	-0.00527887	0.00262233	0.00262296
	8.6	-1.00738e-05	-1.09563e-05	-0.00527833	0.00262288	0.00262347
	8.7	-9.61218e-06	-1.04371e-05	-0.00527783	0.0026234	0.00262395
	8.8	-9.17683e-06	-9.94854e-06	-0.00527736	0.00262389	0.0026244
	8.9	-8.766e-06	-9.48843e-06	-0.00527692	0.00262435	0.00262483
	9	-8.37806e-06	-9.05481e-06	-0.0052765	0.00262478	0.00262523
	9.25	-7.49849e-06	-8.07496e-06	-0.00527556	0.00262576	0.00262615
	9.5	-6.73191e-06	-7.22493e-06	-0.00527473	0.00262661	0.00262694
	9.75	-6.06125e-06	-6.48451e-06	-0.00527402	0.00262735	0.00262764
	10	-5.47239e-06	-5.83711e-06	-0.00527339	0.002628	0.00262824
	10.5	-4.49518e-06	-4.76875e-06	-0.00527235	0.00262907	0.00262925
	11	-3.72727e-06	-3.93515e-06	-0.00527154	0.0026299	0.00263004
	11.5	-3.11701e-06	-3.27684e-06	-0.0052709	0.00263056	0.00263067
	12	-2.62698e-06	-2.75119e-06	-0.00527038	0.00263108	0.00263117
	12.5	-2.22974e-06	-2.32725e-06	-0.00526997	0.00263151	0.00263157
	13	-1.90495e-06	-1.9822e-06	-0.00526963	0.00263185	0.00263191
	13.5	-1.63727e-06	-1.69901e-06	-0.00526935	0.00263214	0.00263218
	14	-1.41506e-06	-1.46479e-06	-0.00526912	0.00263237	0.0026324
	14.5	-1.22933e-06	-1.26969e-06	-0.00526893	0.00263257	0.00263259
	15	-1.07312e-06	-1.1061e-06	-0.00526877	0.00263273	0.00263275
	15.5	-9.40974e-07	-9.68105e-07	-0.00526863	0.00263287	0.00263289
	16	-8.28573e-07	-8.51024e-07	-0.00526852	0.00263299	0.002633
	16.5	-7.32472e-07	-7.51159e-07	-0.00526842	0.00263308	0.0026331
	17	-6.49914e-07	-6.65555e-07	-0.00526833	0.00263317	0.00263318
	17.5	-5.78676e-07	-5.91831e-07	-0.00526826	0.00263324	0.00263325
	18	-5.16937e-07	-5.28058e-07	-0.0052682	0.00263331	0.00263332
	18.5	-4.63222e-07	-4.72664e-07	-0.00526814	0.00263336	0.00263337
	19	-4.1631e-07	-4.24361e-07	-0.00526809	0.00263341	0.00263342
	19.5	-3.75189e-07	-3.82081e-07	-0.00526805	0.00263345	0.00263346
	20	-3.39026e-07	-3.44952e-07	-0.00526802	0.00263349	0.0026335
	22.5	-2.11581e-07	-2.14511e-07	-0.00526789	0.00263362	0.00263362
	25	-1.38787e-07	-1.40349e-07	-0.00526781	0.0026337	0.0026337
	27.5	-9.47845e-08	-9.56623e-08	-0.00526777	0.00263374	0.00263374
	30	-6.69144e-08	-6.74373e-08	-0.00526774	0.00263377	0.00263377
	32.5	-4.85771e-08	-4.89021e-08	-0.00526772	0.00263379	0.00263379
	35	-3.61125e-08	-3.63205e-08	-0.00526771	0.0026338	0.0026338
	40	-2.11661e-08	-2.12612e-08	-0.00526769	0.00263381	0.00263381
	45	-1.32135e-08	-1.32584e-08	-0.00526769	0.00263382	0.00263382
	50	-8.66761e-09	-8.69261e-09	-0.00526768	0.00263383	0.00263383
	60	-4.1798e-09	-4.18985e-09	-0.00526768	0.00263383	0.00263383
	70	-2.25385e-09	-2.2599e-09	-0.00526767	0.00263383	0.00263383
	80	-1.3198e-09	-1.32395e-09	-0.00526767	0.00263383	0.00263383
	100	-5.40951e-10	-5.43e-10	-0.00526767	0.00263384	0.00263384

## Sheet: Ge+-Ne
Ge+-Ne extrapolated basis set (EBS) potentials using RCCSD(T) calculations
Energies in Hartree
	R / Ang	2Sig_nonSO	2Pi_nonSO	2Pi1/2	2Pi3/2	2Sig1/2
	0.8	5.14965	5.02135	5.01952	5.02317	5.14967
	0.85	3.98652	3.85957	3.85765	3.86147	3.98654
	0.9	3.08997	2.96351	2.96152	2.9655	3.08998
	0.95	2.40405	2.27745	2.27536	2.27952	2.40406
	1	1.88121	1.75399	1.75182	1.75614	1.88123
	1.1	1.17967	1.05043	1.04812	1.05272	1.17969
	1.2	0.769941	0.638998	0.636572	0.641399	0.769966
	1.3	0.525779	0.395201	0.392687	0.397681	0.525813
	1.4	0.374746	0.24814	0.245559	0.250676	0.374791
	1.5	0.275919	0.157585	0.15495	0.160159	0.275981
	1.6	0.206954	0.100614	0.0979345	0.103211	0.207037
	1.7	0.156231	0.064054	0.0613333	0.0666636	0.156342
	1.8	0.117801	0.0402284	0.0374657	0.0428448	0.117948
	1.9	0.0883774	0.0245655	0.0217554	0.0271853	0.0885677
	2	0.0658529	0.0142568	0.0113905	0.0168786	0.0660976
	2.1	0.0486908	0.00751742	0.00458256	0.0101405	0.0490026
	2.2	0.0356953	0.0031783	0.000159692	0.00580256	0.0360896
	2.3	0.0259199	0.000457434	-0.00266327	0.00308277	0.0264153
	2.4	0.0186169	-0.00117625	-0.00442013	0.00145012	0.0192344
	2.5	0.0131996	-0.002087	-0.00547684	0.000540365	0.0139621
	2.6	0.00921134	-0.00252566	-0.00608392	0.00010263	0.0101413
	2.7	0.00629918	-0.00266446	-0.00641019	-3.53305e-05	0.00741579
	2.8	0.00419213	-0.00262053	-0.00656582	9.33727e-06	0.00550754
	2.9	0.00268336	-0.00247232	-0.00661951	0.000158196	0.00420003
	3	0.00161609	-0.0022712	-0.00661219	0.000359874	0.003326
	3.1	0.000872197	-0.00204989	-0.00656772	0.000581658	0.00275848
	3.2	0.000363228	-0.00182847	-0.00650051	0.000803473	0.00240332
	3.3	2.32937e-05	-0.00161858	-0.00641999	0.00101369	0.00219243
	3.4	-0.00019634	-0.00142627	-0.00633285	0.00120626	0.0020777
	3.5	-0.000331414	-0.00125397	-0.00624393	0.00137878	0.00202579
	3.6	-0.000407898	-0.00110188	-0.00615669	0.00153106	0.00201398
	3.7	-0.000444496	-0.000968935	-0.00607346	0.00166415	0.00202695
	3.8	-0.000454562	-0.000853459	-0.00599569	0.00177974	0.00205447
	3.9	-0.000447535	-0.000753532	-0.00592417	0.00187977	0.0020898
	4	-0.000430008	-0.00066722	-0.00585916	0.00196616	0.00212856
	4.1	-0.000406512	-0.000592685	-0.00580059	0.00204076	0.00216795
	4.2	-0.000380098	-0.00052825	-0.00574813	0.00210525	0.00220628
	4.3	-0.000352764	-0.000472416	-0.00570132	0.00216113	0.0022426
	4.4	-0.000325773	-0.000423878	-0.00565964	0.00220971	0.00227641
	4.5	-0.000299881	-0.000381516	-0.00562254	0.0022521	0.00230753
	4.6	-0.00027551	-0.000344386	-0.0055895	0.00228926	0.00233596
	4.7	-0.000252858	-0.000311702	-0.00556005	0.00232197	0.00236182
	4.8	-0.000231989	-0.000282818	-0.00553376	0.00235087	0.00238526
	4.9	-0.000212879	-0.000257202	-0.00551025	0.0023765	0.00240646
	5	-0.000195455	-0.000234415	-0.00548921	0.00239931	0.00242562
	5.1	-0.000179616	-0.000214093	-0.00547035	0.00241964	0.00244291
	5.2	-0.000165246	-0.000195926	-0.00545343	0.00243782	0.00245851
	5.3	-0.00015222	-0.00017965	-0.00543822	0.00245411	0.0024726
	5.4	-0.000140417	-0.000165038	-0.00542454	0.00246873	0.00248532
	5.5	-0.000129717	-0.00015189	-0.0054122	0.00248188	0.00249682
	5.6	-0.00012001	-0.000140034	-0.00540105	0.00249374	0.00250723
	5.7	-0.000111192	-0.000129319	-0.00539097	0.00250447	0.00251667
	5.8	-0.00010317	-0.000119613	-0.00538182	0.00251418	0.00252524
	5.9	-9.58614e-05	-0.000110804	-0.00537351	0.00252299	0.00253305
	6	-8.91913e-05	-0.000102793	-0.00536594	0.00253101	0.00254016
	6.1	-8.30946e-05	-9.5493e-05	-0.00535904	0.00253831	0.00254665
	6.2	-7.75137e-05	-8.88307e-05	-0.00535274	0.00254497	0.00255259
	6.3	-7.23973e-05	-8.27403e-05	-0.00534697	0.00255107	0.00255802
	6.4	-6.77006e-05	-7.71647e-05	-0.00534169	0.00255665	0.00256301
	6.5	-6.33832e-05	-7.20532e-05	-0.00533684	0.00256176	0.00256759
	6.6	-5.94097e-05	-6.7361e-05	-0.00533238	0.00256645	0.0025718
	6.7	-5.57478e-05	-6.30481e-05	-0.00532829	0.00257077	0.00257568
	6.8	-5.23691e-05	-5.9079e-05	-0.00532452	0.00257474	0.00257925
	6.9	-4.92479e-05	-5.54215e-05	-0.00532104	0.0025784	0.00258255
	7	-4.63608e-05	-5.20472e-05	-0.00531782	0.00258177	0.00258559
	7.1	-4.36873e-05	-4.893e-05	-0.00531485	0.00258489	0.00258841
	7.2	-4.12083e-05	-4.60469e-05	-0.00531211	0.00258778	0.00259103
	7.3	-3.89069e-05	-4.3377e-05	-0.00530956	0.00259045	0.00259345
	7.4	-3.67678e-05	-4.09014e-05	-0.0053072	0.00259292	0.0025957
	7.5	-3.47771e-05	-3.86032e-05	-0.005305	0.00259522	0.00259779
	7.6	-3.29224e-05	-3.64671e-05	-0.00530296	0.00259736	0.00259974
	7.7	-3.11923e-05	-3.44793e-05	-0.00530106	0.00259935	0.00260156
	7.8	-2.95767e-05	-3.26274e-05	-0.00529928	0.0026012	0.00260325
	7.9	-2.80662e-05	-3.09001e-05	-0.00529763	0.00260293	0.00260483
	8	-2.66526e-05	-2.92873e-05	-0.00529608	0.00260454	0.00260631
	8.1	-2.53284e-05	-2.77799e-05	-0.00529464	0.00260605	0.0026077
	8.2	-2.40865e-05	-2.63694e-05	-0.00529328	0.00260746	0.00260899
	8.3	-2.29208e-05	-2.50484e-05	-0.00529201	0.00260878	0.00261021
	8.4	-2.18257e-05	-2.381e-05	-0.00529082	0.00261002	0.00261135
	8.5	-2.07957e-05	-2.26479e-05	-0.0052897	0.00261118	0.00261243
	8.6	-1.98265e-05	-2.15566e-05	-0.00528865	0.00261228	0.00261344
	8.7	-1.89136e-05	-2.05308e-05	-0.00528766	0.0026133	0.00261439
	8.8	-1.8053e-05	-1.95658e-05	-0.00528673	0.00261427	0.00261528
	8.9	-1.72413e-05	-1.86573e-05	-0.00528586	0.00261518	0.00261613
	9	-1.64749e-05	-1.78014e-05	-0.00528503	0.00261603	0.00261692
	9.25	-1.47385e-05	-1.58682e-05	-0.00528316	0.00261797	0.00261872
	9.5	-1.32262e-05	-1.41922e-05	-0.00528154	0.00261964	0.00262029
	9.75	-1.19039e-05	-1.27331e-05	-0.00528013	0.0026211	0.00262166
	10	-1.07437e-05	-1.1458e-05	-0.00527889	0.00262238	0.00262286
	10.5	-8.81959e-06	-9.35531e-06	-0.00527685	0.00262448	0.00262484
	11	-7.30916e-06	-7.71612e-06	-0.00527525	0.00262612	0.00262639
	11.5	-6.10979e-06	-6.42256e-06	-0.00527399	0.00262741	0.00262762
	12	-5.14725e-06	-5.39033e-06	-0.00527298	0.00262845	0.00262861
	12.5	-4.36748e-06	-4.55825e-06	-0.00527217	0.00262928	0.00262941
	13	-3.73022e-06	-3.88134e-06	-0.0052715	0.00262995	0.00263006
	13.5	-3.20527e-06	-3.32601e-06	-0.00527096	0.00263051	0.00263059
	14	-2.76961e-06	-2.86687e-06	-0.00527051	0.00263097	0.00263103
	14.5	-2.40562e-06	-2.48454e-06	-0.00527013	0.00263135	0.0026314
	15	-2.09959e-06	-2.16406e-06	-0.00526981	0.00263167	0.00263172
	15.5	-1.84074e-06	-1.89377e-06	-0.00526955	0.00263194	0.00263198
	16	-1.62062e-06	-1.6645e-06	-0.00526932	0.00263217	0.0026322
	16.5	-1.43247e-06	-1.46899e-06	-0.00526913	0.00263237	0.00263239
	17	-1.27087e-06	-1.30142e-06	-0.00526896	0.00263253	0.00263256
	17.5	-1.13143e-06	-1.15714e-06	-0.00526882	0.00263268	0.0026327
	18	-1.01062e-06	-1.03235e-06	-0.0052687	0.0026328	0.00263282
	18.5	-9.05531e-07	-9.23974e-07	-0.00526859	0.00263291	0.00263292
	19	-8.13748e-07	-8.29479e-07	-0.0052685	0.00263301	0.00263302
	19.5	-7.33319e-07	-7.46787e-07	-0.00526841	0.00263309	0.0026331
	20	-6.62582e-07	-6.74159e-07	-0.00526834	0.00263316	0.00263317
	22.5	-4.13395e-07	-4.19117e-07	-0.00526809	0.00263342	0.00263342
	25	-2.71115e-07	-2.74166e-07	-0.00526795	0.00263356	0.00263356
	27.5	-1.85129e-07	-1.86847e-07	-0.00526786	0.00263365	0.00263365
	30	-1.30678e-07	-1.31701e-07	-0.0052678	0.0026337	0.00263371
	32.5	-9.48595e-08	-9.54952e-08	-0.00526777	0.00263374	0.00263374
	35	-7.05243e-08	-7.09235e-08	-0.00526774	0.00263377	0.00263377
	40	-4.13323e-08	-4.15155e-08	-0.00526771	0.00263379	0.00263379
	45	-2.57958e-08	-2.58879e-08	-0.0052677	0.00263381	0.00263381
	50	-1.69298e-08	-1.69747e-08	-0.00526769	0.00263382	0.00263382
	60	-8.16362e-09	-8.17657e-09	-0.00526768	0.00263383	0.00263383
	70	-4.42152e-09	-4.42443e-09	-0.00526768	0.00263383	0.00263383
	80	-2.58856e-09	-2.59161e-09	-0.00526767	0.00263383	0.00263383
	100	-1.06113e-09	-1.07138e-09	-0.00526767	0.00263384	0.00263384

## Sheet: Ge+-Ar
Ge+-Ar extrapolated basis set (EBS) potentials using RCCSD(T) calculations
Energies in Hartree
	R / Ang	2Sig_nonSO	2Pi_nonSO	2Pi1/2	2Pi3/2	2Sig1/2
	0.8	8.30759	8.15756	8.15503	8.15999	8.30769
	0.85	6.75295	6.6001	6.59751	6.6026	6.75305
	0.9	5.53752	5.38271	5.38008	5.38524	5.53762
	0.95	4.56483	4.40893	4.40628	4.41148	4.56493
	1	3.77239	3.61622	3.61357	3.61877	3.77249
	1.1	2.57954	2.42466	2.42204	2.42719	2.57963
	1.2	1.7647	1.61155	1.60898	1.61404	1.76477
	1.3	1.21608	1.06272	1.0602	1.06517	1.21613
	1.4	0.853147	0.696791	0.694324	0.699218	0.853188
	1.5	0.615732	0.454488	0.451969	0.457002	0.615737
	1.6	0.459843	0.294314	0.291797	0.296817	0.459856
	1.7	0.352188	0.188267	0.185714	0.190793	0.352215
	1.8	0.269812	0.11787	0.115283	0.120419	0.26985
	1.9	0.205329	0.0710707	0.0684562	0.0736323	0.205382
	2	0.155489	0.0400078	0.0373677	0.0425761	0.155561
	2.1	0.117145	0.0195316	0.0168635	0.0221043	0.11724
	2.2	0.0877012	0.00623186	0.00353037	0.00880849	0.0878261
	2.3	0.0651414	-0.00217935	-0.00492167	0.000401817	0.0653026
	2.4	0.0479181	-0.0072601	-0.0100522	-0.0046737	0.0481239
	2.5	0.0348256	-0.0100874	-0.0129397	-0.0074953	0.0350859
	2.6	0.0249236	-0.0114115	-0.014336	-0.0088137	0.0252503
	2.7	0.0174801	-0.0117558	-0.0147659	-0.00915236	0.0178868
	2.8	0.0119236	-0.0114836	-0.0145949	-0.00887503	0.0124263
	2.9	0.00781107	-0.0108452	-0.0140745	-0.00823206	0.00842715
	3	0.00479921	-0.0100108	-0.0133756	-0.00739363	0.00554678
	3.1	0.0026209	-0.00909407	-0.0126112	-0.00647341	0.00351734
	3.2	0.00107035	-0.00816816	-0.0118517	-0.00554458	0.00213029
	3.3	-1.02621e-05	-0.00727821	-0.0111373	-0.0046522	0.00122281
	3.4	-0.000742524	-0.00645003	-0.0104872	-0.00382202	0.000666652
	3.5	-0.00121873	-0.00569615	-0.00990675	-0.00306653	0.00036224
	3.6	-0.0015084	-0.00502005	-0.00939294	-0.00238909	0.000233527
	3.7	-0.00166451	-0.00442069	-0.00893991	-0.00178868	0.0002227
	3.8	-0.0017263	-0.00389344	-0.00854054	-0.00126051	0.000287864
	3.9	-0.00172324	-0.00343201	-0.00818783	-0.000798392	0.00039897
	4	-0.00167692	-0.00302968	-0.00787605	-0.000395489	0.000535268
	4.1	-0.00160314	-0.00267959	-0.00760014	-4.49367e-05	0.000682752
	4.2	-0.00151339	-0.00237531	-0.00735589	0.000259714	0.000832164
	4.3	-0.00141561	-0.00211078	-0.00713956	0.000524555	0.000977834
	4.4	-0.0013156	-0.0018807	-0.00694803	0.000754881	0.00111614
	4.5	-0.00121678	-0.00168034	-0.00677835	0.000955458	0.00124545
	4.6	-0.00112185	-0.00150555	-0.00662809	0.00113043	0.0013647
	4.7	-0.00103228	-0.00135286	-0.00649497	0.00128323	0.00147374
	4.8	-0.00094864	-0.00121911	-0.00637694	0.00141711	0.00157298
	4.9	-0.000871463	-0.00110168	-0.00627224	0.00153463	0.00166278
	5	-0.000800684	-0.000998404	-0.0061793	0.001638	0.00174381
	5.1	-0.000735987	-0.000907214	-0.00609658	0.00172925	0.00181691
	5.2	-0.000677142	-0.000826531	-0.00602291	0.00180999	0.00188271
	5.3	-0.000623695	-0.000754923	-0.00595716	0.00188165	0.00194197
	5.4	-0.000575171	-0.000691186	-0.00589835	0.00194543	0.00199537
	5.5	-0.000531161	-0.000634254	-0.00584561	0.0020024	0.00204354
	5.6	-0.000491229	-0.000583262	-0.00579822	0.00205343	0.00208704
	5.7	-0.000454955	-0.000537478	-0.00575554	0.00209924	0.00212639
	5.8	-0.000421999	-0.000496231	-0.00571701	0.00214051	0.00216203
	5.9	-0.00039199	-0.000458973	-0.00568212	0.00217779	0.0021944
	6	-0.000364642	-0.000425264	-0.0056505	0.00221152	0.00222381
	6.1	-0.000339687	-0.000394664	-0.00562176	0.00224214	0.00225061
	6.2	-0.000316867	-0.000366828	-0.00559557	0.00226999	0.00227506
	6.3	-0.000295973	-0.000341472	-0.00557168	0.00229536	0.00229741
	6.4	-0.000276813	-0.000318317	-0.00554985	0.00231788	0.00231852
	6.5	-0.000259191	-0.000297097	-0.00552981	0.00233667	0.00233975
	6.6	-0.000242999	-0.000277675	-0.00551146	0.00235392	0.00235919
	6.7	-0.000228061	-0.000259828	-0.00549457	0.00236981	0.00237704
	6.8	-0.000214266	-0.000243397	-0.00547901	0.00238447	0.00239348
	6.9	-0.000201521	-0.000228272	-0.00546467	0.00239799	0.00240861
	7	-0.000189725	-0.000214319	-0.00545143	0.0024105	0.00242257
	7.1	-0.000178784	-0.000201411	-0.00543917	0.00242208	0.00243548
	7.2	-0.000168632	-0.000189482	-0.00542783	0.00243282	0.00244742
	7.3	-0.000159202	-0.000178433	-0.00541732	0.00244278	0.00245847
	7.4	-0.000150427	-0.000168178	-0.00540755	0.00245204	0.00246873
	7.5	-0.00014226	-0.000158667	-0.00539849	0.00246065	0.00247825
	7.6	-0.000134647	-0.000149814	-0.00539004	0.00246867	0.0024871
	7.7	-0.000127544	-0.000141602	-0.0053822	0.00247613	0.00249532
	7.8	-0.000120909	-0.000133933	-0.00537487	0.00248311	0.00250299
	7.9	-0.000114708	-0.000126779	-0.00536803	0.00248962	0.00251015
	8	-0.000108907	-0.000120131	-0.00536167	0.0024957	0.0025168
	8.1	-0.00010347	-0.000113893	-0.00535569	0.0025014	0.00252304
	8.2	-9.83762e-05	-0.000108066	-0.00535011	0.00250674	0.00252887
	8.3	-9.35968e-05	-0.000102629	-0.00534489	0.00251173	0.0025343
	8.4	-8.91079e-05	-9.75187e-05	-0.00533999	0.00251643	0.00253942
	8.5	-8.48889e-05	-9.27225e-05	-0.00533538	0.00252084	0.00254421
	8.6	-8.092e-05	-8.82448e-05	-0.00533107	0.00252497	0.00254869
	8.7	-7.71822e-05	-8.40184e-05	-0.00532701	0.00252887	0.00255292
	8.8	-7.36608e-05	-8.00412e-05	-0.00532318	0.00253254	0.0025569
	8.9	-7.03408e-05	-7.63229e-05	-0.0053196	0.00253599	0.00256062
	9	-6.72027e-05	-7.27977e-05	-0.0053162	0.00253926	0.00256414
	9.25	-6.01072e-05	-6.48516e-05	-0.00530854	0.00254663	0.00257209
	9.5	-5.39284e-05	-5.79953e-05	-0.00530191	0.00255304	0.00257895
	9.75	-4.85195e-05	-5.20021e-05	-0.00529611	0.00255864	0.00258495
	10	-4.37761e-05	-4.67693e-05	-0.00529104	0.00256354	0.00259018
	10.5	-3.59172e-05	-3.81651e-05	-0.00528268	0.00257165	0.00259879
	11	-2.97388e-05	-3.14392e-05	-0.00527614	0.00257801	0.00260551
	11.5	-2.48354e-05	-2.61312e-05	-0.00527096	0.00258304	0.00261082
	12	-2.09018e-05	-2.19242e-05	-0.00526685	0.00258707	0.00261503
	12.5	-1.7711e-05	-1.85044e-05	-0.0052635	0.00259033	0.00261845
	13	-1.51064e-05	-1.57322e-05	-0.00526079	0.00259299	0.00262122
	13.5	-1.29602e-05	-1.34617e-05	-0.00525856	0.00259518	0.00262349
	14	-1.11766e-05	-1.15804e-05	-0.00525671	0.00259699	0.00262538
	14.5	-9.68915e-06	-1.00144e-05	-0.00525517	0.00259851	0.00262694
	15	-8.43755e-06	-8.70512e-06	-0.00525388	0.00259978	0.00262825
	15.5	-7.37754e-06	-7.59763e-06	-0.00525279	0.00260085	0.00262936
	16	-6.47822e-06	-6.65816e-06	-0.00525186	0.00260177	0.0026303
	16.5	-5.70845e-06	-5.86008e-06	-0.00525107	0.00260255	0.0026311
	17	-5.04634e-06	-5.17339e-06	-0.00525039	0.00260322	0.00263178
	17.5	-4.47696e-06	-4.58159e-06	-0.00524981	0.00260379	0.00263238
	18	-3.98246e-06	-4.07301e-06	-0.0052493	0.00260429	0.00263288
	18.5	-3.55175e-06	-3.62858e-06	-0.00524886	0.00260473	0.00263333
	19	-3.17714e-06	-3.24091e-06	-0.00524848	0.00260511	0.00263372
	19.5	-2.84777e-06	-2.90384e-06	-0.00524815	0.00260544	0.00263405
	20	-2.5566e-06	-2.60787e-06	-0.00524785	0.00260573	0.00263435
	22.5	-1.53847e-06	-1.55709e-06	-0.00524681	0.00260676	0.0026354
	25	-9.57831e-07	-9.76677e-07	-0.00524623	0.00260734	0.00263598
	27.5	-2.52197e-06	-2.55796e-06	-0.00524587	0.0026077	0.00263635
	30	-1.56302e-06	-1.59064e-06	-0.00524565	0.00260792	0.00263657
	32.5	-9.93274e-07	-1.00506e-06	-0.00524549	0.00260807	0.00263672
	35	-1.35239e-07	-1.36901e-07	-0.0052454	0.00260817	0.00263682
	40	-1.66691e-08	-1.74007e-08	-0.00524528	0.00260829	0.00263694

## Sheet: Ge+-Kr
Ge+-Kr extrapolated basis set (EBS) potentials using RCCSD(T) calculations
Energies in Hartree
	R / Ang	2Sig_nonSO	2Pi_nonSO	2Pi1/2	2Pi3/2	2Sig1/2
	0.8	12.4258	12.3127	12.3096	12.3156	12.4259
	0.85	9.74881	9.62994	9.6268	9.63296	9.74893
	0.9	7.75941	7.63539	7.63215	7.63851	7.75953
	0.95	6.2522	6.12377	6.12047	6.12696	6.25231
	1	5.08764	4.95558	4.95222	4.95882	5.08775
	1.1	3.4382	3.30091	3.29752	3.3042	3.4383
	1.2	2.36103	2.22031	2.21694	2.2236	2.36111
	1.3	1.6378	1.49414	1.49082	1.49739	1.63787
	1.4	1.14898	1.00175	0.998505	1.00493	1.14904
	1.5	0.81962	0.667655	0.664502	0.67076	0.819667
	1.6	0.598927	0.441246	0.438186	0.444268	0.598965
	1.7	0.451137	0.287928	0.28496	0.290864	0.451168
	1.8	0.348397	0.184116	0.181249	0.186956	0.348424
	1.9	0.26735	0.113855	0.110888	0.116801	0.26737
	2	0.202722	0.0664062	0.0634923	0.0692939	0.202748
	2.1	0.152734	0.0345501	0.0316849	0.037379	0.15277
	2.2	0.114357	0.0134156	0.0105883	0.0161917	0.114408
	2.3	0.0849778	-0.000307459	-0.00311126	0.00242451	0.0850497
	2.4	0.0625499	-0.00889733	-0.0116939	-0.00620017	0.0626493
	2.5	0.0454938	-0.0139417	-0.0167478	-0.0112706	0.0456288
	2.6	0.032584	-0.01656	-0.0193924	-0.0139074	0.0327639
	2.7	0.0228674	-0.0175477	-0.0204233	-0.0149076	0.023103
	2.8	0.0156025	-0.0174697	-0.0204053	-0.0148375	0.0159059
	2.9	0.0102126	-0.0167268	-0.0197396	-0.0140992	0.0105979
	3	0.00625151	-0.0155993	-0.0187069	-0.0129739	0.00673379
	3.1	0.00337302	-0.0142807	-0.017501	-0.0116561	0.00396875
	3.2	0.00131091	-0.0129008	-0.0162515	-0.010276	0.00203676
	3.3	-0.000138347	-0.0115428	-0.0150401	-0.0089172	0.000733292
	3.4	-0.00113075	-0.0102577	-0.0139148	-0.00763105	-0.000100341
	3.5	-0.00178467	-0.00907326	-0.0128988	-0.00644543	-0.000586972
	3.6	-0.00218979	-0.00800181	-0.0119984	-0.00537283	-0.000822153
	3.7	-0.0024145	-0.00704566	-0.0112096	-0.0044156	-0.000880577
	3.8	-0.00251024	-0.00620076	-0.0105226	-0.00356973	-0.00081947
	3.9	-0.00251542	-0.00545947	-0.00992511	-0.00282759	-0.000681654
	4	-0.00245898	-0.00481215	-0.00940513	-0.00217952	-0.000498632
	4.1	-0.0023622	-0.00424859	-0.00895153	-0.00161533	-0.000292524
	4.2	-0.00224052	-0.00375891	-0.00855487	-0.00112509	-7.83678e-05
	4.3	-0.0021054	-0.00333359	-0.00820708	-0.000699306	0.000133812
	4.4	-0.00196467	-0.00296397	-0.00790131	-0.000329301	0.000338
	4.5	-0.00182418	-0.0026427	-0.00763221	-7.70262e-06	0.000530323
	4.6	-0.00168758	-0.00236288	-0.00739482	0.000272399	0.000709086
	4.7	-0.00155717	-0.00211867	-0.00718503	0.000516839	0.000873681
	4.8	-0.00143466	-0.00190522	-0.00699954	0.000730489	0.00102395
	4.9	-0.00132057	-0.00171807	-0.00683514	0.000917818	0.00116063
	5	-0.00121502	-0.00155341	-0.00668906	0.0010826	0.00128462
	5.1	-0.00111823	-0.00140851	-0.00655943	0.00122763	0.00139655
	5.2	-0.00102957	-0.00128041	-0.00644391	0.00135582	0.00149769
	5.3	-0.000948581	-0.00116684	-0.00634079	0.00146948	0.00158904
	5.4	-0.000874973	-0.00106604	-0.00624875	0.00157036	0.00167134
	5.5	-0.000807944	-0.000976201	-0.00616629	0.00166026	0.00174568
	5.6	-0.000746898	-0.000895903	-0.00609223	0.00174062	0.00181291
	5.7	-0.000691536	-0.000824066	-0.00602575	0.0018125	0.00187358
	5.8	-0.000641112	-0.000759545	-0.00596583	0.00187706	0.00192856
	5.9	-0.000595237	-0.000701391	-0.00591168	0.00193525	0.00197841
	6	-0.00055339	-0.000648991	-0.00586273	0.00198769	0.00202368
	6.1	-0.000515208	-0.000601543	-0.00581832	0.00203516	0.00206487
	6.2	-0.000480359	-0.000558454	-0.00577794	0.00207828	0.00210239
	6.3	-0.000448456	-0.000519359	-0.0057412	0.00211739	0.00213664
	6.4	-0.000419194	-0.000483696	-0.00570764	0.00215307	0.00216798
	6.5	-0.00039239	-0.000451172	-0.005677	0.00218562	0.00219665
	6.6	-0.000367723	-0.000421397	-0.00564891	0.00221541	0.00222299
	6.7	-0.000345018	-0.000394098	-0.00562312	0.00224272	0.00224719
	6.8	-0.000324087	-0.000369049	-0.00559943	0.00226778	0.00226947
	6.9	-0.000304762	-0.000345998	-0.00557761	0.00229001	0.00229084
	7	-0.000286893	-0.000324769	-0.00555749	0.00230898	0.00231208
	7.1	-0.00027034	-0.000305174	-0.0055389	0.00232653	0.00233168
	7.2	-0.000254996	-0.000287074	-0.00552171	0.00234277	0.00234979
	7.3	-0.000240751	-0.00027032	-0.00550578	0.00235784	0.00236656
	7.4	-0.000227496	-0.000254783	-0.005491	0.00237184	0.0023821
	7.5	-0.000215174	-0.000240379	-0.00547729	0.00238484	0.00239651
	7.6	-0.000203688	-0.000226994	-0.00546453	0.00239695	0.0024099
	7.7	-0.000192958	-0.000214531	-0.00545264	0.00240825	0.00242237
	7.8	-0.000182951	-0.000202943	-0.00544157	0.00241878	0.00243396
	7.9	-0.000173597	-0.000192134	-0.00543125	0.00242861	0.00244477
	8	-0.000164821	-0.000182029	-0.00542158	0.00243782	0.00245488
	8.1	-0.000156617	-0.000172607	-0.00541256	0.00244642	0.00246431
	8.2	-0.000148932	-0.0001638	-0.00540413	0.00245448	0.00247312
	8.3	-0.000141683	-0.000155519	-0.00539619	0.00246207	0.0024814
	8.4	-0.000134905	-0.000147794	-0.00538878	0.00246916	0.00248913
	8.5	-0.000128529	-0.000140542	-0.00538182	0.00247582	0.00249638
	8.6	-0.000122505	-0.000133713	-0.00537525	0.00248211	0.00250321
	8.7	-0.000116856	-0.000127322	-0.00536911	0.002488	0.00250961
	8.8	-0.000111538	-0.000121313	-0.00536333	0.00249355	0.00251562
	8.9	-0.00010649	-0.000115633	-0.00535786	0.0024988	0.0025213
	9	-0.000101759	-0.000110301	-0.00535273	0.00250373	0.00252663
	9.25	-9.10235e-05	-9.8292e-05	-0.00534114	0.00251489	0.00253865
	9.5	-8.1632e-05	-8.78358e-05	-0.00533104	0.00252463	0.0025491
	9.75	-7.34671e-05	-7.87814e-05	-0.00532228	0.00253309	0.00255816
	10	-6.63109e-05	-7.08616e-05	-0.00531461	0.00254049	0.00256608
	10.5	-5.43659e-05	-5.77924e-05	-0.00530192	0.00255281	0.00257916
	11	-4.50341e-05	-4.76244e-05	-0.00529203	0.00256242	0.00258933
	11.5	-3.76236e-05	-3.96029e-05	-0.00528421	0.00257003	0.00259735
	12	-3.1651e-05	-3.31976e-05	-0.00527794	0.00257614	0.00260375
	12.5	-2.68336e-05	-2.80424e-05	-0.0052729	0.00258107	0.00260891
	13	-2.29002e-05	-2.38495e-05	-0.0052688	0.00258509	0.00261311
	13.5	-1.96298e-05	-2.03964e-05	-0.0052654	0.00258842	0.00261656
	14	-1.6943e-05	-1.75582e-05	-0.00526261	0.00259116	0.0026194
	14.5	-1.47023e-05	-1.51945e-05	-0.00526029	0.00259344	0.00262176
	15	-1.27935e-05	-1.32041e-05	-0.00525833	0.00259538	0.00262375
	15.5	-1.11956e-05	-1.15294e-05	-0.00525668	0.002597	0.00262543
	16	-9.84801e-06	-1.01207e-05	-0.00525529	0.00259837	0.00262684
	16.5	-8.66194e-06	-8.8941e-06	-0.00525408	0.00259957	0.00262806
	17	-7.67021e-06	-7.86298e-06	-0.00525306	0.00260057	0.00262909
	17.5	-6.81862e-06	-6.97699e-06	-0.00525219	0.00260143	0.00262998
	18	-6.05126e-06	-6.1906e-06	-0.0052514	0.00260221	0.00263077
	18.5	-5.41087e-06	-5.5277e-06	-0.00525075	0.00260285	0.00263143
	19	-4.85416e-06	-4.94973e-06	-0.00525018	0.00260342	0.00263201
	19.5	-4.33425e-06	-4.42118e-06	-0.00524965	0.00260394	0.00263254
	20	-3.91049e-06	-3.98685e-06	-0.00524922	0.00260437	0.00263297
	22.5	-2.37689e-06	-2.40867e-06	-0.00524766	0.00260592	0.00263455
	25	-1.474e-06	-1.49755e-06	-0.00524675	0.00260682	0.00263546
	27.5	-9.48448e-07	-9.60182e-07	-0.00524622	0.00260735	0.002636
	30	-6.312e-07	-6.33095e-07	-0.00524589	0.00260767	0.00263632
	32.5	-3.76597e-07	-3.89229e-07	-0.00524565	0.00260792	0.00263657
	35	-2.38268e-07	-2.42833e-07	-0.0052455	0.00260806	0.00263671
	40	-7.62116e-08	-7.3753e-08	-0.00524534	0.00260823	0.00263688

## Sheet: Ge+-Xe
Ge+-Xe extrapolated basis set (EBS) potentials using RCCSD(T) calculations
Energies in Hartree
	R / Ang	2Sig_nonSO	2Pi_nonSO	2Pi1/2	2Pi3/2	2Sig1/2
	0.8	18.3677	18.3783	18.3746	18.3817	18.368
	0.85	14.3698	14.3744	14.3707	14.3778	14.3701
	0.9	11.3262	11.3204	11.3165	11.3239	11.3266
	0.95	9.01222	8.99486	8.99081	8.99856	9.01256
	1	7.24349	7.21518	7.21098	7.21905	7.24382
	1.1	4.81223	4.76573	4.76128	4.76988	4.81252
	1.2	3.29048	3.23105	3.22647	3.23535	3.29075
	1.3	2.28907	2.22057	2.21597	2.22493	2.28931
	1.4	1.60684	1.53108	1.52653	1.53541	1.60706
	1.5	1.26747	1.05194	1.0475	1.05628	1.26757
	1.6	0.926705	0.717037	0.712736	0.721247	0.926796
	1.7	0.684906	0.482979	0.478836	0.487038	0.68499
	1.8	0.445676	0.319752	0.315769	0.323619	0.44579
	1.9	0.369733	0.206235	0.202424	0.20996	0.369819
	2	0.285761	0.127567	0.123932	0.131122	0.285842
	2.1	0.215744	0.0733346	0.0697077	0.0769603	0.215745
	2.2	0.162185	0.0362561	0.0328042	0.0397068	0.162186
	2.3	0.121181	0.0112482	0.00795781	0.0145355	0.121184
	2.4	0.0897624	-0.00525217	-0.00840397	-0.00210813	0.0897701
	2.5	0.0657132	-0.0157513	-0.0187917	-0.0127282	0.0657305
	2.6	0.0473613	-0.0220249	-0.0249824	-0.0191007	0.0473946
	2.7	0.0334274	-0.0253395	-0.0282426	-0.022494	0.033485
	2.8	0.0229198	-0.0266064	-0.0294826	-0.023822	0.0230116
	2.9	0.0150629	-0.0264881	-0.0293632	-0.0237498	0.0151997
	3	0.00924637	-0.0254677	-0.028366	-0.0227635	0.00944041
	3.1	0.00499162	-0.0238951	-0.0268391	-0.0212154	0.00525593
	3.2	0.001924	-0.0220216	-0.0250327	-0.0193592	0.00227265
	3.3	-0.000246715	-0.0200241	-0.0231225	-0.0173735	0.000201059
	3.4	-0.00174531	-0.0180231	-0.0212279	-0.0153804	-0.00118321
	3.5	-0.00274385	-0.016098	-0.0194269	-0.0134604	-0.00205253
	3.6	-0.00337314	-0.0142969	-0.0177655	-0.0116624	-0.00253903
	3.7	-0.0037332	-0.0126464	-0.0162671	-0.0100137	-0.0027453
	3.8	-0.00389924	-0.0111569	-0.0149376	-0.00852499	-0.00275044
	3.9	-0.00392736	-0.00982869	-0.0137722	-0.00719709	-0.00261547
	4	-0.00386	-0.0086546	-0.0127583	-0.00602293	-0.00238801
	4.1	-0.00372842	-0.00762351	-0.0118797	-0.00499156	-0.0021042
	4.2	-0.00355574	-0.00672277	-0.0111198	-0.00409043	-0.00179104
	4.3	-0.00335905	-0.00593808	-0.0104619	-0.00330532	-0.00146803
	4.4	-0.00315065	-0.00525589	-0.00989117	-0.00262268	-0.00114858
	4.5	-0.0029391	-0.00466347	-0.00939491	-0.00202983	-0.000841295
	4.6	-0.00273079	-0.00414889	-0.00896212	-0.00151486	-0.000551596
	4.7	-0.00252976	-0.00370155	-0.00858354	-0.00106716	-0.000282158
	4.8	-0.00233857	-0.00331223	-0.00825152	-0.000677525	-3.39926e-05
	4.9	-0.00215885	-0.00297266	-0.00795947	-0.00033767	0.000192969
	5	-0.00199127	-0.00267583	-0.0077019	-4.05973e-05	0.000399572
	5.1	-0.0018362	-0.00241569	-0.00747424	0.000219761	0.00058689
	5.2	-0.00169322	-0.00218706	-0.00727243	0.000448588	0.000756506
	5.3	-0.00156186	-0.00198554	-0.0070931	0.000650249	0.000909905
	5.4	-0.00144173	-0.00180747	-0.00693351	0.000828474	0.00104838
	5.5	-0.00133187	-0.00164956	-0.00679103	0.0009865	0.00117354
	5.6	-0.00123153	-0.00150918	-0.00666356	0.00112698	0.00128668
	5.7	-0.00114012	-0.00138407	-0.00654936	0.00125218	0.00138892
	5.8	-0.00105673	-0.00127217	-0.00644672	0.00136416	0.00148149
	5.9	-0.000980638	-0.00117182	-0.00635426	0.00146458	0.00156541
	6	-0.000911325	-0.0010817	-0.00627093	0.00155476	0.00164145
	6.1	-0.000847979	-0.00100043	-0.00619552	0.00163608	0.0017106
	6.2	-0.000790061	-0.00092701	-0.00612717	0.00170955	0.00177354
	6.3	-0.000737162	-0.000860527	-0.00606514	0.00177607	0.00183085
	6.4	-0.000688659	-0.000800164	-0.00600866	0.00183647	0.0018832
	6.5	-0.000644117	-0.000745204	-0.00595712	0.00189146	0.00193113
	6.6	-0.000603311	-0.000695139	-0.00591009	0.00194155	0.00197495
	6.7	-0.000565745	-0.000649324	-0.00586699	0.00198739	0.00201521
	6.8	-0.000531067	-0.000607383	-0.00582744	0.00202936	0.00205225
	6.9	-0.000499193	-0.00056893	-0.00579115	0.00206783	0.00208627
	7	-0.000469716	-0.000533588	-0.00575774	0.00210319	0.00211766
	7.1	-0.000442402	-0.00050098	-0.00572687	0.00213581	0.0021467
	7.2	-0.000417205	-0.000470934	-0.00569843	0.00216587	0.00217348
	7.3	-0.000393762	-0.000443254	-0.00567214	0.00219357	0.00219831
	7.4	-0.000371924	-0.000417508	-0.00564768	0.00221932	0.00222142
	7.5	-0.000351791	-0.000393761	-0.00562513	0.00224274	0.00224308
	7.6	-0.000332897	-0.00037171	-0.00560412	0.00226266	0.00226514
	7.7	-0.000315303	-0.000351188	-0.00558456	0.00228121	0.00228567
	7.8	-0.000298989	-0.000332187	-0.00556645	0.00229841	0.00230468
	7.9	-0.000283627	-0.000314419	-0.00554948	0.00231456	0.00232245
	8	-0.000269273	-0.000297786	-0.0055336	0.00232966	0.00233909
	8.1	-0.00025593	-0.00028241	-0.00551889	0.00234367	0.00235448
	8.2	-0.000243362	-0.00026796	-0.00550507	0.00235685	0.00236893
	8.3	-0.000231506	-0.000254407	-0.00549207	0.00236927	0.00238249
	8.4	-0.000220493	-0.000241779	-0.00547998	0.00238081	0.00239512
	8.5	-0.000210081	-0.000229904	-0.00546859	0.0023917	0.002407
	8.6	-0.00020027	-0.00021875	-0.00545788	0.00240195	0.00241816
	8.7	-0.000191111	-0.000208362	-0.0054479	0.00241152	0.00242855
	8.8	-0.000182429	-0.000198533	-0.00543845	0.00242058	0.00243838
	8.9	-0.000174227	-0.000189277	-0.00542954	0.00242912	0.00244764
	9	-0.000166531	-0.00018061	-0.0054212	0.00243714	0.00245631
	9.25	-0.000149092	-0.000161061	-0.00540235	0.00245527	0.00247586
	9.5	-0.000133857	-0.000144039	-0.00538592	0.0024711	0.00249289
	9.75	-0.000120612	-0.000129332	-0.0053717	0.00248482	0.0025076
	10	-0.000108945	-0.00011643	-0.00535921	0.00249689	0.00252051
	10.5	-8.9637e-05	-9.52252e-05	-0.00533863	0.00251683	0.00254172
	11	-7.45071e-05	-7.87366e-05	-0.00532259	0.0025324	0.00255821
	11.5	-6.25123e-05	-6.57639e-05	-0.00530995	0.00254472	0.00257119
	12	-5.28495e-05	-5.53617e-05	-0.00529979	0.00255463	0.00258159
	12.5	-4.50731e-05	-4.70401e-05	-0.00529165	0.00256258	0.00258991
	13	-3.86975e-05	-4.0245e-05	-0.00528499	0.0025691	0.00259671
	13.5	-3.34027e-05	-3.46461e-05	-0.00527949	0.00257449	0.00260231
	14	-2.90734e-05	-3.00706e-05	-0.005275	0.0025789	0.00260688
	14.5	-2.54304e-05	-2.62305e-05	-0.00527123	0.00258261	0.00261072
	15	-2.23571e-05	-2.30215e-05	-0.00526806	0.00258573	0.00261393
	15.5	-1.97875e-05	-2.03299e-05	-0.00526541	0.00258834	0.00261663
	16	-1.75865e-05	-1.80272e-05	-0.00526314	0.00259057	0.00261893
	16.5	-1.56969e-05	-1.60752e-05	-0.00526121	0.00259248	0.00262088
	17	-1.4094e-05	-1.44067e-05	-0.00525956	0.00259411	0.00262255
	17.5	-1.27011e-05	-1.29561e-05	-0.00525813	0.00259552	0.002624
	18	-1.14872e-05	-1.17153e-05	-0.0052569	0.00259674	0.00262524
	18.5	-1.04458e-05	-1.06347e-05	-0.00525583	0.0025978	0.00262632
	19	-9.52983e-06	-9.68472e-06	-0.00525489	0.00259872	0.00262727
	19.5	-8.72098e-06	-8.86405e-06	-0.00525408	0.00259954	0.00262809
	20	-8.03407e-06	-8.15572e-06	-0.00525338	0.00260023	0.0026288
	22.5	-5.53615e-06	-5.58958e-06	-0.00525083	0.00260275	0.00263137
	25	-4.10847e-06	-4.14358e-06	-0.00524939	0.00260418	0.00263281
	27.5	-3.25681e-06	-3.27565e-06	-0.00524853	0.00260504	0.00263368
	30	-2.71486e-06	-2.71932e-06	-0.00524798	0.00260559	0.00263424
	32.5	-2.35376e-06	-2.36599e-06	-0.00524762	0.00260595	0.00263459
	35	-2.11467e-06	-2.11699e-06	-0.00524738	0.00260619	0.00263484
	40	-1.82604e-06	-1.82452e-06	-0.00524709	0.00260648	0.00263513
	45	-1.66594e-06	-1.66552e-06	-0.00524693	0.00260664	0.00263529
	50	-1.57897e-06	-1.57775e-06	-0.00524684	0.00260673	0.00263538
	60	-1.49443e-06	-1.49135e-06	-0.00524675	0.00260681	0.00263547
	70	-1.45342e-06	-1.45228e-06	-0.00524671	0.00260685	0.0026355
	80	-1.43709e-06	-1.43561e-06	-0.0052467	0.00260687	0.00263552
	90	-1.43127e-06	-1.42813e-06	-0.00524669	0.00260687	0.00263553
	100	-1.41978e-06	-1.41839e-06	-0.00524668	0.00260689	0.00263554

## Sheet: Ge+Rn
Ge+-Rn extrapolated basis set (EBS) potentials using RCCSD(T) calculations
Energies in Hartree
	R / Ang	2Sig_nonSO	2Pi_nonSO	2Pi1/2	2Pi3/2	2Sig1/2
	0.85	17.9638	17.8888	17.8803	17.8954	17.9657
	0.9	14.1901	14.1121	14.1035	14.1188	14.192
	0.95	11.2807	11.1976	11.1888	11.2046	11.2825
	1	9.03568	8.94623	8.93729	8.95354	9.03731
	1.1	5.93868	5.83603	5.82675	5.84391	5.94008
	1.2	4.02169	3.90725	3.89775	3.9155	4.02295
	1.3	2.78823	2.66464	2.65506	2.67309	2.78936
	1.4	1.96525	1.83513	1.82562	1.84363	1.96626
	1.5	1.40167	1.26675	1.25743	1.27517	1.40256
	1.6	1.01029	0.871215	0.862196	0.879442	1.01108
	1.7	0.737343	0.593909	0.585271	0.601842	0.738049
	1.8	0.633363	0.398966	0.390776	0.406824	0.633696
	1.9	0.439987	0.261929	0.254235	0.269138	0.440473
	2	0.328868	0.165791	0.158624	0.172461	0.329365
	2.1	0.245588	0.0986303	0.0917214	0.10543	0.245697
	2.2	0.183034	0.05205	0.0456658	0.0582503	0.183218
	2.3	0.135488	0.0201232	0.0142836	0.0257502	0.1357
	2.4	0.0993328	-0.00135626	-0.00665765	0.00374135	0.0995366
	2.5	0.0718693	-0.015386	-0.0201824	-0.0107591	0.0720389
	2.6	0.0510664	-0.0241116	-0.0284544	-0.0198909	0.0511887
	2.7	0.0353857	-0.0290776	-0.0330292	-0.0251989	0.0354587
	2.8	0.0236489	-0.0313987	-0.0350278	-0.0278013	0.0236806
	2.9	0.0149437	-0.0318888	-0.0352655	-0.028518	0.0149497
	3	0.00856065	-0.0311446	-0.034337	-0.0279531	0.00856148
	3.1	0.00394523	-0.0296041	-0.032675	-0.0265522	0.00396416
	3.2	0.000666299	-0.027587	-0.0305929	-0.0246423	0.000727395
	3.3	-0.00161077	-0.0253246	-0.028315	-0.0224612	-0.00148378
	3.4	-0.00314307	-0.0229796	-0.0259975	-0.0201773	-0.00292739
	3.5	-0.00412712	-0.0206646	-0.0237472	-0.0179079	-0.00380127
	3.6	-0.00471171	-0.0184541	-0.0216329	-0.0157311	-0.00425593
	3.7	-0.00500899	-0.0163924	-0.0196938	-0.0136942	-0.00440582
	3.8	-0.00510253	-0.0145057	-0.0179506	-0.0118256	-0.00433784
	3.9	-0.00505446	-0.0128032	-0.0164063	-0.0101361	-0.00411839
	4	-0.00491059	-0.0112841	-0.0150537	-0.00862653	-0.00379858
	4.1	-0.00470441	-0.00993999	-0.0138777	-0.00728918	-0.0034175
	4.2	-0.00446049	-0.00875781	-0.0128593	-0.00611181	-0.00300499
	4.3	-0.0041964	-0.00772355	-0.0119794	-0.00508095	-0.00258316
	4.4	-0.00392457	-0.00682174	-0.011219	-0.00418149	-0.0021676
	4.5	-0.00365402	-0.0060378	-0.0105613	-0.00339917	-0.00176919
	4.6	-0.00339076	-0.00535631	-0.0099904	-0.00271877	-0.00139422
	4.7	-0.00313867	-0.00476415	-0.00949354	-0.00212732	-0.0010461
	4.8	-0.00290024	-0.0042508	-0.00906088	-0.00161442	-0.000726533
	4.9	-0.00267691	-0.00380377	-0.00868185	-0.00116766	-0.000434931
	5	-0.00246912	-0.00341414	-0.00834902	-0.00077818	-0.0001702
	5.1	-0.00227689	-0.00307382	-0.00805595	-0.0004379	6.93173e-05
	5.2	-0.00209985	-0.00277579	-0.00779709	-0.000139877	0.00028555
	5.3	-0.00193716	-0.00251391	-0.00756769	0.000122008	0.000480691
	5.4	-0.00178833	-0.00228337	-0.00736413	0.000352613	0.000656446
	5.5	-0.00165215	-0.00207959	-0.00718278	0.00055646	0.000814995
	5.6	-0.00152763	-0.00189891	-0.00702079	0.000737198	0.000958145
	5.7	-0.00141415	-0.00173838	-0.00687596	0.000897805	0.00108725
	5.8	-0.00131052	-0.00159518	-0.00674597	0.00104107	0.00120402
	5.9	-0.00121585	-0.00146706	-0.00662901	0.00116925	0.00130979
	6	-0.00112957	-0.00135225	-0.00652371	0.00128412	0.00140553
	6.1	-0.0010507	-0.00124898	-0.00642857	0.00138745	0.00149247
	6.2	-0.000978515	-0.00115576	-0.00634235	0.00148071	0.0015716
	6.3	-0.000912579	-0.00107162	-0.00626426	0.0015649	0.00164354
	6.4	-0.000852144	-0.000995315	-0.00619322	0.00164125	0.0017092
	6.5	-0.000796623	-0.00092592	-0.00612843	0.00171068	0.00176929
	6.6	-0.000745783	-0.000862853	-0.00606941	0.00177378	0.00182414
	6.7	-0.000698958	-0.000805232	-0.00601536	0.00183143	0.00187451
	6.8	-0.000655734	-0.000752512	-0.00596578	0.00188417	0.00192085
	6.9	-0.00061605	-0.000704261	-0.00592036	0.00193245	0.00196334
	7	-0.00057934	-0.000659976	-0.00587858	0.00197675	0.00200253
	7.1	-0.00054533	-0.00061914	-0.00583999	0.00201761	0.00203877
	7.2	-0.000513918	-0.000581568	-0.00580445	0.0020552	0.0020722
	7.3	-0.000484843	-0.000546982	-0.00577169	0.0020898	0.00210308
	7.4	-0.00045768	-0.000514839	-0.00574119	0.00212196	0.00213187
	7.5	-0.000432661	-0.000485244	-0.00571311	0.00215157	0.00215839
	7.6	-0.000409221	-0.000457773	-0.00568696	0.00217905	0.00218315
	7.7	-0.000387352	-0.000432214	-0.00566262	0.00220462	0.00220622
	7.8	-0.000367138	-0.000408577	-0.00564012	0.00222756	0.00222827
	7.9	-0.000348113	-0.000386503	-0.00561905	0.00224758	0.00225035
	8	-0.000330296	-0.000365842	-0.00559933	0.00226633	0.00227102
	8.1	-0.000313794	-0.000346768	-0.0055811	0.00228367	0.0022901
	8.2	-0.000298256	-0.000328864	-0.00556398	0.00229999	0.00230801
	8.3	-0.000283549	-0.000312042	-0.00554786	0.00231539	0.00232484
	8.4	-0.000269953	-0.00029641	-0.0055329	0.00232965	0.00234048
	8.5	-0.000257098	-0.000281713	-0.00551881	0.00234311	0.00235518
	8.6	-0.00024495	-0.000267896	-0.00550555	0.00235581	0.002369
	8.7	-0.000233645	-0.000255056	-0.00549322	0.00236762	0.00238184
	8.8	-0.00022294	-0.000242921	-0.00548155	0.00237879	0.00239398
	8.9	-0.000212788	-0.000231452	-0.00547052	0.00238937	0.00240546
	9	-0.000203307	-0.000220747	-0.00546022	0.00239926	0.00241616
	9.25	-0.000181786	-0.000196623	-0.00543696	0.00242163	0.0024403
	9.5	-0.000162973	-0.000175581	-0.00541666	0.00244118	0.00246134
	9.75	-0.000146649	-0.000157438	-0.00539912	0.0024581	0.00247949
	10	-0.00013229	-0.000141547	-0.00538374	0.00247297	0.00249539
	10.5	-0.000108472	-0.000115385	-0.00535835	0.00249756	0.00252155
	11	-8.98553e-05	-9.50793e-05	-0.00533861	0.00251673	0.00254186
	11.5	-7.50991e-05	-7.91103e-05	-0.00532304	0.00253188	0.00255784
	12	-6.31794e-05	-6.6278e-05	-0.00531051	0.0025441	0.00257067
	12.5	-5.36119e-05	-5.60344e-05	-0.00530049	0.00255389	0.00258092
	13	-4.5773e-05	-4.76843e-05	-0.00529231	0.0025619	0.00258927
	13.5	-3.92612e-05	-4.07892e-05	-0.00528554	0.00256854	0.00259616
	14	-3.39333e-05	-3.51619e-05	-0.00528001	0.00257397	0.00260179
	14.5	-2.94671e-05	-3.04543e-05	-0.00527539	0.00257851	0.0026065
	15	-2.56561e-05	-2.64734e-05	-0.00527146	0.00258238	0.00261048
	15.5	-2.2511e-05	-2.31786e-05	-0.00526822	0.00258557	0.00261378
	16	-1.98191e-05	-2.03631e-05	-0.00526544	0.00258831	0.00261659
	16.5	-1.74635e-05	-1.7928e-05	-0.00526303	0.00259069	0.00261903
	17	-1.55089e-05	-1.58935e-05	-0.00526103	0.00259267	0.00262106
	17.5	-1.3811e-05	-1.41261e-05	-0.00525928	0.00259439	0.00262283
	18	-1.22862e-05	-1.25653e-05	-0.00525773	0.00259593	0.00262439
	18.5	-1.10228e-05	-1.12547e-05	-0.00525644	0.00259721	0.0026257
	19	-9.9122e-06	-1.01034e-05	-0.0052553	0.00259833	0.00262685
	19.5	-8.88405e-06	-9.05822e-06	-0.00525426	0.00259936	0.0026279
	20	-8.0567e-06	-8.20468e-06	-0.00525342	0.0026002	0.00262875
	22.5	-5.00038e-06	-5.06722e-06	-0.00525031	0.00260328	0.00263189
	25	-3.21292e-06	-3.2551e-06	-0.0052485	0.00260508	0.0026337
	27.5	-2.18272e-06	-2.20511e-06	-0.00524746	0.00260611	0.00263475
	30	-1.53153e-06	-1.53995e-06	-0.0052468	0.00260677	0.00263542
	32.5	-1.05333e-06	-1.06564e-06	-0.00524632	0.00260725	0.00263589
	35	-7.78876e-07	-7.82649e-07	-0.00524604	0.00260752	0.00263617
	40	-4.38732e-07	-4.38352e-07	-0.0052457	0.00260787	0.00263652
	45	-2.07988e-07	-2.09306e-07	-0.00524547	0.0026081	0.00263675
	50	-1.20754e-07	-1.20141e-07	-0.00524538	0.00260818	0.00263684
	60	-3.11385e-08	-2.88015e-08	-0.00524529	0.00260827	0.00263693

## Sheet: Si+-He
Si+-He extrapolated basis set (EBS) potentials using RCCSD(T) calculations
Potentials of W. D. Tuttle, R. L. Thorington, L. A. Viehland and T. G. Wright, Mol. Phys., 2017, 115, 437. DOI: 10.1080/00268976.2016.1269965
Energies in Hartree
	R / Ang	2Sig_nonSO	2Pi_nonSO	2Pi1/2	2Pi3/2	2Sig1/2
	1.1	0.388019	0.217354	0.216989	0.217718	0.38802
	1.2	0.305296	0.140908	0.140543	0.141272	0.305297
	1.3	0.243488	0.0934656	0.0930976	0.0938325	0.243489
	1.4	0.193715	0.0632291	0.0628575	0.0635992	0.193717
	1.5	0.152763	0.0433347	0.0429593	0.0437079	0.152765
	1.6	0.119204	0.0298157	0.0294367	0.0301917	0.119207
	1.7	0.0920388	0.0203799	0.0199974	0.0207585	0.0920428
	1.75	0.0805658	0.0167487	0.0163644	0.0171284	0.0805704
	1.8	0.0703498	0.0136812	0.0132952	0.014062	0.070355
	1.85	0.0612821	0.0110879	0.0107002	0.0114697	0.0612881
	1.9	0.0532578	0.00889661	0.00850711	0.00927928	0.0532647
	1.95	0.0461771	0.00704792	0.00665662	0.00743141	0.0461849
	2	0.0399458	0.00549248	0.00509932	0.00587672	0.0399547
	2.05	0.034476	0.0041886	0.00379351	0.00457353	0.0344861
	2.1	0.0296863	0.00310071	0.00270357	0.00348624	0.0296979
	2.15	0.025502	0.00219817	0.00179884	0.00258425	0.0255153
	2.2	0.0218549	0.00145444	0.00105256	0.00184113	0.0218701
	2.25	0.018683	0.000846479	0.000442036	0.00123358	0.0187003
	2.3	0.0159304	0.000354186	-5.307e-05	0.000741668	0.0159501
	2.35	0.0135467	-3.99372e-05	-0.000450309	0.000347878	0.0135692
	2.4	0.0114869	-0.000351125	-0.000764969	3.69842e-05	0.0115126
	2.45	0.00971069	-0.000592615	-0.00101035	-0.000204246	0.00974005
	2.5	0.00818234	-0.000775873	-0.00119797	-0.000387276	0.00821584
	2.55	0.00687006	-0.000910801	-0.00133782	-0.000522003	0.00690828
	2.6	0.00574575	-0.00100591	-0.00143847	-0.000616937	0.00578934
	2.65	0.00478463	-0.00106849	-0.00150729	-0.000679359	0.00483431
	2.7	0.00396489	-0.00110473	-0.00155057	-0.000715471	0.00402147
	2.75	0.00326739	-0.00111991	-0.00157364	-0.000730524	0.00333174
	2.8	0.00267537	-0.00111842	-0.00158098	-0.000728936	0.00274845
	2.85	0.00217419	-0.00110398	-0.00157636	-0.000714404	0.002257
	2.9	0.00175109	-0.00107966	-0.0015629	-0.000690001	0.00184468
	2.95	0.00139495	-0.00104799	-0.00154314	-0.000658261	0.00150037
	3	0.00109613	-0.00101104	-0.00151914	-0.000621259	0.00121443
	3.05	0.000846275	-0.000970517	-0.00149251	-0.000580679	0.000978426
	3.1	0.000638161	-0.000927761	-0.0014645	-0.000537877	0.000785013
	3.15	0.000465548	-0.000883856	-0.00143602	-0.000493931	0.000627789
	3.2	0.00032306	-0.00083965	-0.00140772	-0.00044969	0.000501174
	3.25	0.000206077	-0.000795801	-0.00138002	-0.00040581	0.000400305
	3.3	0.000110631	-0.000752809	-0.00135316	-0.000362792	0.000320959
	3.35	3.33243e-05	-0.000711046	-0.00132725	-0.000321006	0.000259486
	3.4	-2.87477e-05	-0.000670779	-0.00130233	-0.000280718	0.000212745
	3.45	-7.80643e-05	-0.000632191	-0.00127839	-0.000242112	0.000178059
	3.5	-0.000116736	-0.000595397	-0.00125539	-0.000205304	0.00015316
	3.6	-0.000169053	-0.000527407	-0.001212	-0.000137288	0.000125426
	3.7	-0.000197004	-0.000466869	-0.0011719	-7.6731e-05	0.000117884
	3.8	-0.000208652	-0.000413447	-0.0011349	-2.32938e-05	0.00012265
	3.9	-0.000209684	-0.000366586	-0.00110096	2.35793e-05	0.000134523
	4	-0.000204061	-0.000325632	-0.00107001	6.45423e-05	0.000150139
	4.1	-0.000194505	-0.000289909	-0.00104196	0.000100272	0.000167365
	4.2	-0.000182852	-0.000258763	-0.00101669	0.000131424	0.000184885
	4.3	-0.00017031	-0.000231589	-0.00099401	0.000158602	0.000201919
	4.4	-0.000157658	-0.000207846	-0.000973727	0.000182349	0.000218028
	4.5	-0.000145371	-0.000187056	-0.00095562	0.000203142	0.000232996
	4.6	-0.000133725	-0.000168807	-0.000939474	0.000221394	0.000246742
	4.7	-0.000122863	-0.000152746	-0.00092508	0.000237457	0.000259269
	4.8	-0.000112841	-0.000138571	-0.000912245	0.000251633	0.000270629
	4.9	-0.00010366	-0.000126025	-0.000900789	0.00026418	0.000280898
	5	-9.52911e-05	-0.00011489	-0.000890553	0.000275317	0.000290165
	5.2	-8.07806e-05	-9.61334e-05	-0.000873182	0.000294075	0.00030606
	5.4	-6.88435e-05	-8.11134e-05	-0.000859173	0.000309097	0.000319006
	5.6	-5.9013e-05	-6.8959e-05	-0.000847784	0.000321252	0.000329601
	5.8	-5.0882e-05	-5.90277e-05	-0.000838448	0.000331184	0.000338326
	6	-4.41174e-05	-5.08408e-05	-0.000830732	0.000339372	0.000345561
	6.2	-3.84538e-05	-4.40388e-05	-0.000824307	0.000346174	0.000351601
	6.4	-3.36826e-05	-3.83474e-05	-0.000818921	0.000351866	0.000356677
	6.6	-2.96395e-05	-3.35554e-05	-0.000814378	0.000356659	0.000360969
	6.8	-2.61943e-05	-2.94969e-05	-0.000810523	0.000360717	0.000364618
	7	-2.32431e-05	-2.60404e-05	-0.000807235	0.000364174	0.000367737
	7.3	-1.95633e-05	-2.17611e-05	-0.000803155	0.000368454	0.000371616
	7.6	-1.65925e-05	-1.83342e-05	-0.00079988	0.000371881	0.000374738
	8	-1.34633e-05	-1.47568e-05	-0.000796452	0.000375458	0.000378017
	8.5	-1.05259e-05	-1.14343e-05	-0.000793258	0.000378781	0.000381082
	9	-8.35173e-06	-9.00168e-06	-0.000790911	0.000381214	0.000383343
	10	-5.4593e-06	-5.80893e-06	-0.000787819	0.000384407	0.000386335
	11	-3.72043e-06	-3.91948e-06	-0.00078598	0.000386296	0.000388124
	12	-2.62313e-06	-2.74198e-06	-0.000784829	0.000387474	0.000389248
	13	-1.90264e-06	-1.97651e-06	-0.000784079	0.000388239	0.000389984
	14	-1.41362e-06	-1.46114e-06	-0.000783572	0.000388754	0.000390482
	15	-1.07218e-06	-1.10369e-06	-0.00078322	0.000389112	0.000390828
	17	-6.49472e-07	-6.64415e-07	-0.000782786	0.000389551	0.000391257
	19	-4.16091e-07	-4.23779e-07	-0.000782548	0.000389792	0.000391492
	22	-2.31405e-07	-2.346e-07	-0.00078236	0.000389981	0.000391679
	25	-1.38755e-07	-1.40241e-07	-0.000782266	0.000390075	0.000391772
	30	-6.6901e-08	-6.7397e-08	-0.000782194	0.000390148	0.000391844
	35	-3.6101e-08	-3.6309e-08	-0.000782163	0.000390179	0.000391875
	40	-2.1163e-08	-2.1252e-08	-0.000782148	0.000390194	0.00039189
	45	-1.3213e-08	-1.3256e-08	-0.00078214	0.000390202	0.000391898
	50	-8.672e-09	-8.685e-09	-0.000782135	0.000390207	0.000391902

## Sheet: Si+-Ne
Si+-Ne extrapolated basis set (EBS) potentials using RCCSD(T) calculations
Potentials of W. D. Tuttle, R. L. Thorington, L. A. Viehland and T. G. Wright, Mol. Phys., 2017, 115, 437. DOI: 10.1080/00268976.2016.1269965
Energies in Hartree
	R / Ang	2Sig_nonSO	2Pi_nonSO	2Pi1/2	2Pi3/2	2Sig1/2
	50	-1.6917e-08	-1.6955e-08	-0.000794961	0.000397455	0.000397455
	45	-2.5791e-08	-2.5867e-08	-0.00079497	0.000397446	0.000397446
	40	-4.1313e-08	-4.1485e-08	-0.000794985	0.00039743	0.000397431
	35	-7.0495e-08	-7.0877e-08	-0.000795015	0.000397401	0.000397401
	30	-1.30626e-07	-1.31607e-07	-0.000795075	0.00039734	0.000397341
	25	-2.70989e-07	-2.73896e-07	-0.000795217	0.000397198	0.0003972
	22	-4.52071e-07	-4.58318e-07	-0.0007954	0.000397014	0.000397018
	19	-8.13149e-07	-8.28171e-07	-0.000795767	0.000396644	0.000396654
	17	-1.26968e-06	-1.29889e-06	-0.000796233	0.000396173	0.000396193
	15	-2.09705e-06	-2.1587e-06	-0.000797082	0.000395313	0.000395354
	14	-2.76575e-06	-2.85877e-06	-0.000797772	0.000394613	0.000394675
	13	-3.72409e-06	-3.86872e-06	-0.000798764	0.000393603	0.0003937
	12	-5.13707e-06	-5.36998e-06	-0.000800236	0.000392102	0.000392257
	11	-7.29113e-06	-7.68256e-06	-0.000802496	0.000389789	0.00039005
	10	-1.07094e-05	-1.14026e-05	-0.000806115	0.000386069	0.000386532
	9	-1.64068e-05	-1.77097e-05	-0.000812219	0.000379762	0.000380631
	8	-2.65067e-05	-2.90914e-05	-0.000823175	0.00036838	0.000370106
	7.5	-3.45406e-05	-3.82634e-05	-0.000831969	0.000359207	0.000361694
	7	-4.59506e-05	-5.14494e-05	-0.000844566	0.00034602	0.000349696
	6.6	-5.87764e-05	-6.64808e-05	-0.000858867	0.000330988	0.000336141
	6.3	-7.15446e-05	-8.16301e-05	-0.000873231	0.000315838	0.000322588
	6	-8.80614e-05	-0.000101445	-0.000891961	0.000296021	0.000304988
	5.8	-0.000101797	-0.00011808	-0.000907646	0.000279385	0.000290303
	5.6	-0.000118309	-0.000138244	-0.000926617	0.00025922	0.0002726
	5.4	-0.000138266	-0.000162851	-0.000949713	0.00023461	0.000251135
	5.2	-0.000162507	-0.000193129	-0.000978043	0.000204329	0.000224948
	5	-0.000192046	-0.000230746	-0.00101307	0.000166709	0.000192828
	4.8	-0.000227977	-0.000277991	-0.00105674	0.000119459	0.000153319
	4.6	-0.000271232	-0.000338055	-0.00111157	5.93888e-05	0.000104834
	4.5	-0.000295716	-0.000374245	-0.00114417	2.31948e-05	7.67671e-05
	4.4	-0.000321972	-0.000415482	-0.00118088	-1.80471e-05	4.5994e-05
	4.3	-0.000349678	-0.000462648	-0.00122229	-6.52183e-05	1.25357e-05
	4.2	-0.000378205	-0.000516784	-0.00126904	-0.000119361	-2.33691e-05
	4.1	-0.000406464	-0.0005791	-0.00132187	-0.000181686	-6.11098e-05
	4	-0.00043268	-0.000650967	-0.00138159	-0.000253562	-9.94646e-05
	3.9	-0.000454077	-0.000733881	-0.00144911	-0.000336487	-0.000136241
	3.8	-0.000466463	-0.000829416	-0.00152551	-0.000432036	-0.000167753
	3.7	-0.000463656	-0.000939131	-0.00161206	-0.000541767	-0.00018809
	3.6	-0.000436737	-0.00106444	-0.00171037	-0.000667093	-0.000188148
	3.5	-0.000373041	-0.00120639	-0.00182231	-0.00080907	-0.000154448
	3.45	-0.000322101	-0.00128377	-0.00188399	-0.00088646	-0.000119198
	3.4	-0.000254825	-0.00136538	-0.00194972	-0.000968077	-6.77732e-05
	3.35	-0.000167911	-0.00145107	-0.00201963	-0.00105378	3.37141e-06
	3.3	-5.74868e-05	-0.00154059	-0.00209369	-0.00114332	9.83485e-05
	3.25	8.09785e-05	-0.00163352	-0.00217171	-0.00123627	0.000221907
	3.2	0.000252774	-0.00172928	-0.00225326	-0.00133204	0.00037952
	3.15	0.000464065	-0.00182702	-0.00233767	-0.0014298	0.000577495
	3.1	0.000722019	-0.00192561	-0.00242389	-0.00152841	0.000823094
	3.05	0.00103496	-0.00202357	-0.00251049	-0.00162638	0.00112469
	3	0.00141252	-0.00211895	-0.00259554	-0.00172178	0.00149194
	2.95	0.00186585	-0.00220929	-0.00267656	-0.00181213	0.00193596
	2.9	0.00240779	-0.00229146	-0.00275038	-0.00189431	0.00246955
	2.85	0.00305313	-0.00236156	-0.00281303	-0.00196442	0.00310746
	2.8	0.00381886	-0.00241477	-0.00285963	-0.00201763	0.00386658
	2.75	0.0047244	-0.00244514	-0.00288418	-0.002048	0.00476629
	2.7	0.00579196	-0.00244547	-0.00287937	-0.00204831	0.0058287
	2.65	0.0070468	-0.00240702	-0.00283642	-0.00200984	0.00707901
	2.6	0.00851758	-0.00231932	-0.00274478	-0.00192209	0.00854581
	2.55	0.0102367	-0.00216985	-0.00259187	-0.00177256	0.0102614
	2.5	0.0122406	-0.00194377	-0.00236268	-0.00154651	0.0122622
	2.45	0.01457	-0.00162354	-0.00203988	-0.00122618	0.014589
	2.4	0.0172704	-0.00118855	-0.00160267	-0.000791043	0.017287
	2.35	0.0203922	-0.00061461	-0.00102685	-0.000216915	0.0204067
	2.3	0.0239905	0.000126598	-0.00028407	0.000524532	0.0240033
	2.25	0.0281258	0.0010682	0.00065882	0.00146643	0.028137
	2.2	0.0328631	0.00224899	0.00184064	0.00264759	0.0328729
	2.15	0.038272	0.00371454	0.00330696	0.0041136	0.0382805
	2.1	0.0444259	0.00551864	0.00511159	0.00591826	0.0444333
	2.05	0.051401	0.00772516	0.0073184	0.00812543	0.0514075
	2	0.0592752	0.0104105	0.0100038	0.0108116	0.0592809
	1.95	0.0681267	0.0136671	0.0132603	0.0140691	0.0681316
	1.9	0.0780328	0.0176076	0.0172004	0.0180106	0.078037
	1.85	0.0890702	0.0223712	0.0219634	0.0227752	0.0890739
	1.8	0.101318	0.0281317	0.0277232	0.028537	0.101321
	1.75	0.114863	0.0351093	0.0347001	0.0355158	0.114866
	1.7	0.12982	0.0435862	0.043182	0.0439881	0.129822
	1.6	0.164728	0.0666125	0.0662059	0.0670175	0.164729
	1.5	0.208887	0.101734	0.101326	0.102142	0.208888
	1.4	0.268933	0.156866	0.156456	0.157273	0.268934
	1.3	0.358442	0.245962	0.245556	0.246368	0.358443
	1.2	0.502685	0.393657	0.393259	0.394055	0.502686
	1.1	0.746954	0.643821	0.643437	0.644203	0.746955
	1	1.17192	1.07497	1.07461	1.07533	1.17192
	0.8	3.25353	3.15758	3.15728	3.15787	3.25353

## Sheet: Si+-Ar
Si+-Ar extrapolated basis set (EBS) potentials using RCCSD(T) calculations
Potentials of W. D. Tuttle, R. L. Thorington, L. A. Viehland and T. G. Wright, Mol. Phys., 2017, 115, 437. DOI: 10.1080/00268976.2016.1269965
Energies in Hartree
	R / Ang	2Sig_nonSO	2Pi_nonSO	2Pi1/2	2Pi3/2	2Sig1/2
	50	-6.9264e-08	-6.946e-08	-0.000795013	0.000397402	0.000397403
	45	-1.05593e-07	-1.05946e-07	-0.00079505	0.000397366	0.000397366
	40	-1.69157e-07	-1.69874e-07	-0.000795113	0.000397302	0.000397303
	35	-2.88639e-07	-2.90227e-07	-0.000795234	0.000397182	0.000397183
	30	-5.34881e-07	-5.3888e-07	-0.000795481	0.000396933	0.000396936
	25	-1.1096e-06	-1.12154e-06	-0.000796061	0.00039635	0.000396358
	22	-1.85108e-06	-1.87676e-06	-0.000796812	0.000395595	0.000395612
	19	-3.32973e-06	-3.3915e-06	-0.000798315	0.00039408	0.000394122
	17	-5.19939e-06	-5.31968e-06	-0.000800223	0.000392152	0.000392232
	15	-8.58807e-06	-8.84247e-06	-0.000803702	0.000388629	0.000388799
	14	-1.13272e-05	-1.17116e-05	-0.000806527	0.00038576	0.000386017
	13	-1.52532e-05	-1.58518e-05	-0.000810596	0.00038162	0.00038202
	12	-2.10425e-05	-2.20081e-05	-0.00081663	0.000375463	0.000376108
	11	-2.98704e-05	-3.14933e-05	-0.000825897	0.000365978	0.000367062
	10	-4.38839e-05	-4.67477e-05	-0.000840738	0.000350723	0.000352636
	9	-6.72512e-05	-7.2609e-05	-0.000865772	0.000324861	0.000328442
	8.5	-8.48653e-05	-9.23853e-05	-0.000884833	0.000305084	0.000310113
	8	-0.000108747	-0.000119514	-0.00091089	0.000277953	0.000285162
	7.7	-0.000127257	-0.000140757	-0.000931235	0.000256709	0.000265754
	7.3	-0.000158691	-0.000177197	-0.000966036	0.000220267	0.000232683
	7	-0.000189008	-0.00021272	-0.000999864	0.000184742	0.000200673
	6.6	-0.000241927	-0.000275483	-0.00105945	0.000121974	0.000144581
	6.3	-0.000294484	-0.000338648	-0.00111923	5.88051e-05	8.86436e-05
	6	-0.000362467	-0.000421473	-0.00119739	-2.40278e-05	1.5999e-05
	5.8	-0.000419156	-0.000491512	-0.00126329	-9.40731e-05	-4.48161e-05
	5.6	-0.00048756	-0.000577303	-0.00134379	-0.000179872	-0.000118501
	5.4	-0.000570536	-0.000683514	-0.0014431	-0.000286093	-0.000208375
	5.2	-0.000671496	-0.00081654	-0.00156688	-0.000419133	-0.00031856
	5	-0.00079422	-0.000985209	-0.00172289	-0.000587821	-0.00045393
	4.9	-0.000864887	-0.00108656	-0.00181614	-0.000689181	-0.000532677
	4.8	-0.000942227	-0.00120171	-0.0019217	-0.000804343	-0.000619591
	4.7	-0.00102639	-0.00133288	-0.00204153	-0.000935536	-0.000715092
	4.6	-0.00111723	-0.00148268	-0.00217792	-0.00108535	-0.000819313
	4.5	-0.00121417	-0.00165407	-0.00233363	-0.00125676	-0.000931913
	4.4	-0.00131599	-0.00185051	-0.00251196	-0.00145322	-0.00105182
	4.3	-0.00142057	-0.00207593	-0.00271686	-0.00167868	-0.00117689
	4.2	-0.00152454	-0.00233485	-0.00295312	-0.00193762	-0.00130349
	4.1	-0.00162282	-0.00263236	-0.00322625	-0.00223524	-0.00142605
	4	-0.00170803	-0.00297421	-0.00354309	-0.00257713	-0.00153623
	3.9	-0.00176973	-0.00336668	-0.00391081	-0.00296966	-0.00162263
	3.8	-0.00179334	-0.00381655	-0.00433714	-0.00341957	-0.00166972
	3.7	-0.00175888	-0.00433075	-0.00482985	-0.00393383	-0.00165671
	3.6	-0.00163923	-0.00491596	-0.0053961	-0.0045191	-0.00155597
	3.5	-0.00139798	-0.00557788	-0.00604178	-0.00518106	-0.00133091
	3.45	-0.00121718	-0.00593884	-0.00639563	-0.00554204	-0.00115719
	3.4	-0.000986691	-0.00632008	-0.00677041	-0.00592328	-0.000933158
	3.35	-0.00069802	-0.00672144	-0.00716592	-0.00632464	-0.000650333
	3.3	-0.000341426	-0.00714239	-0.0075816	-0.00674559	-0.000299016
	3.25	9.4224e-05	-0.00758193	-0.00801641	-0.0071851	0.000131884
	3.2	0.000621642	-0.00803847	-0.00846873	-0.0076416	0.000655037
	3.15	0.00125532	-0.00850968	-0.00893619	-0.00811275	0.00128489
	3.1	0.00201175	-0.00899237	-0.00941555	-0.00859535	0.0020379
	3.05	0.00290967	-0.00948224	-0.0099025	-0.00908509	0.00293277
	3	0.00397034	-0.00997372	-0.0103914	-0.00957639	0.00399071
	2.95	0.00521783	-0.0104597	-0.0108752	-0.0100621	0.00523578
	2.9	0.00667935	-0.0109311	-0.0113447	-0.0105332	0.00669513
	2.85	0.00838556	-0.0113768	-0.0117889	-0.0109786	0.00839941
	2.8	0.010371	-0.0117831	-0.0121939	-0.0113844	0.0103831
	2.75	0.0126743	-0.012133	-0.0125429	-0.0117338	0.0126849
	2.7	0.015339	-0.0124063	-0.0128156	-0.0120063	0.0153482
	2.65	0.0184134	-0.0125784	-0.0129873	-0.0121775	0.0184214
	2.6	0.0219515	-0.0126197	-0.0130287	-0.0122178	0.0219585
	2.55	0.0260132	-0.012495	-0.0129043	-0.0120918	0.0260192
	2.5	0.0306648	-0.0121622	-0.0125722	-0.0117575	0.03067
	2.45	0.0359796	-0.0115711	-0.0119821	-0.0111645	0.035984
	2.4	0.0420382	-0.0106617	-0.0110742	-0.010253	0.042042
	2.35	0.0489292	-0.00936238	-0.00977682	-0.00895119	0.0489324
	2.3	0.0567496	-0.0075874	-0.00800018	-0.00717706	0.056752
	2.25	0.0656056	-0.00523348	-0.00564973	-0.00481924	0.0656076
	2.2	0.0756133	-0.00217581	-0.00259613	-0.00175715	0.075615
	2.15	0.0868999	0.00173722	0.00131223	0.00216083	0.0869013
	2.1	0.0996049	0.00669077	0.00626053	0.00711987	0.0996061
	2.05	0.113882	0.0129122	0.0124761	0.0133473	0.113883
	2	0.129902	0.0206821	0.0202397	0.0211237	0.129902
	1.95	0.147853	0.0303482	0.0298989	0.0307968	0.147854
	1.9	0.167949	0.0423431	0.0418865	0.0427991	0.167949
	1.85	0.190429	0.0572064	0.0567422	0.0576701	0.19043
	1.8	0.215582	0.0756126	0.0751406	0.0760842	0.215582
	1.75	0.243793	0.0984054	0.0979254	0.0988851	0.243794
	1.7	0.275678	0.126641	0.126152	0.127129	0.275679
	1.6	0.355189	0.205052	0.204547	0.205557	0.355189
	1.5	0.470283	0.325884	0.325362	0.326405	0.470283
	1.4	0.647927	0.5125	0.511963	0.513038	0.647928
	1.3	0.92676	0.800758	0.800204	0.801312	0.92676
	1.2	1.36226	1.24393	1.24336	1.24449	1.36226
	1	3.01507	2.89588	2.89533	2.89644	3.01507

## Sheet: Si+-Kr
Si+-Kr extrapolated basis set (EBS) potentials using RCCSD(T) calculations
Energies in Hartree
	R / Ang	2Sig_nonSO	2Pi_nonSO	2Pi1/2	2Pi3/2	2Sig1/2
	0.85	6.90281	6.76914	6.7677	6.77057	6.90283
	0.9	5.70929	5.57896	5.57755	5.58033	5.70933
	0.95	4.75277	4.62546	4.62407	4.6268	4.75281
	1	3.96867	3.84409	3.84268	3.84545	3.96872
	1.1	2.76557	2.64487	2.64351	2.64618	2.76561
	1.2	1.91572	1.79532	1.79401	1.79659	1.91575
	1.3	1.32574	1.20184	1.20057	1.20308	1.32577
	1.4	0.925435	0.795331	0.794015	0.796646	0.925436
	1.5	0.658385	0.520592	0.519342	0.521842	0.658385
	1.6	0.48198	0.336271	0.335086	0.337456	0.48198
	1.7	0.364892	0.213062	0.211962	0.214162	0.364892
	1.8	0.282934	0.130866	0.129859	0.131873	0.282934
	1.9	0.21972	0.0761371	0.0752246	0.077049	0.219721
	2	0.169222	0.0398285	0.0390072	0.0406488	0.169224
	2.1	0.129204	0.0159267	0.0151895	0.0166625	0.129206
	2.2	0.0977639	0.000437214	-0.000225974	0.0010992	0.0977651
	2.3	0.0732101	-0.00930632	-0.00990693	-0.00870648	0.0732109
	2.4	0.0541495	-0.0151069	-0.0156562	-0.014558	0.0541499
	2.5	0.0394517	-0.0182074	-0.0187157	-0.0176992	0.0394517
	2.6	0.0282061	-0.0194752	-0.0199516	-0.0189989	0.0282062
	2.7	0.0196742	-0.019527	-0.0199794	-0.0190752	0.0196748
	2.8	0.0132596	-0.0188024	-0.0192373	-0.0183693	0.0132613
	2.9	0.00848529	-0.0176149	-0.0180377	-0.0171957	0.00848887
	3	0.00497122	-0.0161837	-0.0165986	-0.0157748	0.00497732
	3.1	0.00241974	-0.0146596	-0.0150704	-0.0142582	0.00242919
	3.2	0.00059856	-0.0131423	-0.0135519	-0.0127464	0.000612329
	3.3	-0.000673321	-0.0116943	-0.0121055	-0.0113024	-0.000654107
	3.4	-0.00153457	-0.0103513	-0.0107665	-0.00996217	-0.00150858
	3.5	-0.00209095	-0.00913062	-0.00955216	-0.00874342	-0.0020566
	3.6	-0.00242363	-0.00803713	-0.00846749	-0.00765131	-0.00237909
	3.7	-0.0025947	-0.00706803	-0.00750972	-0.00668316	-0.00253788
	3.8	-0.0026495	-0.00621563	-0.00667123	-0.0058314	-0.00257813
	3.9	-0.0026236	-0.00547	-0.00594209	-0.0050862	-0.00253531
	4	-0.00254321	-0.00482015	-0.00531116	-0.00443662	-0.00243572
	4.1	-0.00242792	-0.00425576	-0.00476773	-0.00387241	-0.0022993
	4.2	-0.00229191	-0.00376505	-0.0042995	-0.00338181	-0.00214072
	4.3	-0.00214559	-0.00333907	-0.0038967	-0.00295588	-0.00197115
	4.4	-0.00199631	-0.00296911	-0.00354983	-0.00258593	-0.00179876
	4.5	-0.00184911	-0.00264827	-0.0032511	-0.0022651	-0.00162945
	4.6	-0.00170732	-0.00236807	-0.00299165	-0.00198489	-0.00146693
	4.7	-0.00157312	-0.00212359	-0.00276607	-0.00174039	-0.00131384
	4.8	-0.00144755	-0.00190976	-0.00256913	-0.00152654	-0.0011714
	4.9	-0.00133122	-0.00172234	-0.00239659	-0.00133909	-0.00104022
	5	-0.00122417	-0.00155763	-0.00224485	-0.00117436	-0.000920211
	5.1	-0.00112612	-0.00141259	-0.00211103	-0.0010293	-0.000810966
	5.2	-0.0010366	-0.00128438	-0.00199251	-0.000901075	-0.000711764
	5.3	-0.00095509	-0.00117085	-0.00188733	-0.000787532	-0.000621923
	5.4	-0.000880982	-0.00107002	-0.0017937	-0.00068669	-0.000540624
	5.5	-0.000813641	-0.000980186	-0.0017101	-0.000596853	-0.000467061
	5.6	-0.00075244	-0.000899912	-0.00163523	-0.000516575	-0.000400458
	5.7	-0.000696804	-0.000827996	-0.00156802	-0.000444659	-0.000340118
	5.8	-0.000646202	-0.000763391	-0.00150753	-0.000380057	-0.000285399
	5.9	-0.000600118	-0.000705193	-0.00145294	-0.000321864	-0.000235697
	6	-0.000558113	-0.000652621	-0.00140356	-0.0002693	-0.000190493
	6.1	-0.000519765	-0.000605025	-0.00135879	-0.000221716	-0.000149312
	6.2	-0.000484713	-0.000561842	-0.00131811	-0.000178547	-0.00011174
	6.3	-0.00045263	-0.000522564	-0.00128107	-0.000139286	-7.74036e-05
	6.4	-0.000423219	-0.000486763	-0.00124727	-0.000103506	-4.59725e-05
	6.5	-0.000396214	-0.000454069	-0.00121637	-7.08342e-05	-1.7152e-05
	6.6	-0.000371385	-0.000424147	-0.00118806	-4.09379e-05	9.31744e-06
	6.7	-0.000348522	-0.000396739	-0.0011621	-1.35586e-05	3.36579e-05
	6.8	-0.00032744	-0.000371545	-0.00113822	1.1605e-05	5.60877e-05
	6.9	-0.000307951	-0.0003484	-0.00111625	3.47158e-05	7.67863e-05
	7	-0.000289947	-0.000327048	-0.00109598	5.60317e-05	9.59081e-05
	7.1	-0.000273265	-0.000307367	-0.00107727	7.56741e-05	0.0001136
	7.2	-0.000257782	-0.00028915	-0.00105995	9.38506e-05	0.000130014
	7.3	-0.000243413	-0.000272327	-0.00104392	0.00011063	0.000145226
	7.4	-0.000230046	-0.000256693	-0.00102903	0.000126217	0.00015938
	7.5	-0.000217608	-0.000242212	-0.00101522	0.000140651	0.000172536
	7.6	-0.000206003	-0.000228744	-0.00100237	0.000154056	0.000184793
	7.7	-0.000195185	-0.000216228	-0.000990406	0.000166534	0.000196232
	7.8	-0.000185073	-0.000204558	-0.000979249	0.00017815	0.000206911
	7.9	-0.00017561	-0.000193676	-0.00096894	0.000200058	0.000205919
	8	-0.000166754	-0.000183518	-0.000959206	0.000210221	0.000215194
	8.1	-0.000158464	-0.000174038	-0.000950112	0.000219706	0.000223867
	8.2	-0.000150682	-0.000165158	-0.00094159	0.000228589	0.000232003
	8.3	-0.000143374	-0.000156841	-0.000933602	0.00023691	0.000239637
	8.4	-0.000136508	-0.000149048	-0.000926113	0.000244706	0.000246802
	8.5	-0.00013006	-0.00014175	-0.000919092	0.000252008	0.000253525
	8.6	-0.000123985	-0.000134885	-0.000912486	0.000258875	0.000259856
	8.7	-0.000118261	-0.000128436	-0.000906274	0.000265328	0.000265814
	8.8	-0.000112866	-0.00012237	-0.000900428	0.000271415	0.000271407
	8.9	-0.000107785	-0.000116672	-0.000894932	0.000276707	0.000277097
	9	-0.000102983	-0.00011129	-0.000889741	0.000281697	0.000282482
	9.25	-9.20881e-05	-9.91625e-05	-0.000878019	0.000292991	0.000294615
	9.5	-8.2623e-05	-8.86392e-05	-0.000867844	0.000302799	0.000305143
	9.75	-7.43397e-05	-7.9493e-05	-0.000858982	0.000311362	0.000314294
	10	-6.70667e-05	-7.14989e-05	-0.000851225	0.000318868	0.000322293
	10.5	-5.50024e-05	-5.83133e-05	-0.00083841	0.000331296	0.000335485
	11	-4.55287e-05	-4.8036e-05	-0.000828398	0.000341029	0.000345769
	11.5	-3.80137e-05	-3.99278e-05	-0.000820486	0.000348735	0.000353882
	12	-3.19654e-05	-3.3456e-05	-0.000814154	0.00035492	0.000360358
	12.5	-2.70836e-05	-2.82477e-05	-0.000809054	0.000359906	0.000365569
	13	-2.30847e-05	-2.40033e-05	-0.000804891	0.000363983	0.000369816
	13.5	-1.97889e-05	-2.05248e-05	-0.000801473	0.000367337	0.000373297
	14	-1.70532e-05	-1.76441e-05	-0.000798641	0.000370119	0.00037618
	14.5	-1.47746e-05	-1.52556e-05	-0.000796288	0.000372432	0.000378571
	15	-1.28514e-05	-1.32385e-05	-0.000794302	0.000374385	0.000380589
	15.5	-1.12277e-05	-1.15496e-05	-0.000792635	0.000376029	0.00038228
	16	-9.84388e-06	-1.0109e-05	-0.000791213	0.00037743	0.000383722
	16.5	-8.66815e-06	-8.89072e-06	-0.000790009	0.000378619	0.000384941
	17	-7.65023e-06	-7.83063e-06	-0.000788963	0.00037965	0.000386002
	17.5	-6.77707e-06	-6.93282e-06	-0.000788073	0.00038053	0.000386901
	18	-6.01609e-06	-6.14657e-06	-0.000787296	0.000381299	0.000387688
	18.5	-5.36159e-06	-5.47443e-06	-0.000786629	0.000381958	0.00038836
	19	-4.781e-06	-4.87136e-06	-0.000786034	0.000382546	0.000388964
	19.5	-4.27859e-06	-4.36016e-06	-0.000785525	0.000383051	0.000389476
	20	-3.82842e-06	-3.8974e-06	-0.000785067	0.000383504	0.000389939
	22.5	-2.27208e-06	-2.30795e-06	-0.000783488	0.00038507	0.00039153
	25	-1.37561e-06	-1.3893e-06	-0.000782577	0.000385973	0.00039245
	27.5	-8.37924e-07	-8.48625e-07	-0.000782037	0.00038651	0.000392992
	30	-4.93527e-07	-4.98873e-07	-0.000781689	0.000386856	0.000393342
	32.5	-2.73339e-07	-2.78612e-07	-0.000781469	0.000387076	0.000393563
	35	-1.16041e-07	-1.13823e-07	-0.000781307	0.000387235	0.000393728

[truncated: 2 more sheets: Si+-Xe, Si+-Rn]
