# Supplementary material for: Interactions of Si+(2PJ) and Ge+ (2PJ) with rare gas atoms (He–Rn): interaction potentials, spectroscopy, and ion transport coefficients
Source: Royal Society of Chemistry journal article supplement (doi:10.1039/d1cp05710c), 2022-01-01
Supplement: d1cp05710c2.xlsx [file d1cp05710c2.xlsx]

## Sheet: Ge+-He
Vibrational levels used for the Birge-Sponer-like analysis of (74)Ge+-(4)He
Using the extrapolated basis set (EBS) RCCSD(T) potentials for 2Sig and 2Pi (non-spin-orbit)
Vibrational level energy given in cm-1
	2Sig			2Pi
	v	E(v) / cm-1		v	E(v) / cm-1
	0	-27.7044		0	-230.574
	1	-8.6883		1	-136.621
	2	-1.795		2	-70.8214
	3	-0.1415		3	-30.6616
				4	-10.4055
				5	-2.387
				6	-0.2342

## Sheet: Ge+-Ne
Vibrational levels used for the Birge-Sponer-like analysis of (74)Ge+-(20)Ne
Using the extrapolated basis set (EBS) RCCSD(T) potentials for 2Sig and 2Pi (non-spin-orbit)
Vibrational level energy given in cm-1
	2Sig			2Pi
	v	E(v) / cm-1		v	E(v) / cm-1
	0	-86.3566		0	-542.578
	1	-63.2531		1	-462.198
	2	-44.8145		2	-388.954
	3	-30.5844		3	-322.88
	4	-20.0274		4	-263.991
	5	-12.5084		5	-212.245
	6	-7.3788		6	-167.522
	7	-4.0555		7	-129.602
	8	-2.0259		8	-98.1445
	9	-0.8822		9	-72.6356
	10	-0.311		10	-52.3879
	11	-0.076		11	-36.6521
	12	-0.0084		12	-24.7358
				13	-15.9858
				14	-9.7937
				15	-5.6193
				16	-2.9629
				17	-1.3905
				18	-0.5505
				19	-0.1657
				20	-0.0298
				21	-0.0013

## Sheet: Ge+-Ar
Vibrational levels used for the Birge-Sponer-like analysis of (74)Ge+-(40)Ar
Using the extrapolated basis set (EBS) RCCSD(T) potentials for 2Sig and 2Pi (non-spin-orbit)
Vibrational level energy given in cm-1
	2Sig			2Pi
	v	E(v) / cm-1		v	E(v) / cm-1
	0	-360.652		0	-2514.4
	1	-323.688		1	-2385.57
	2	-289.115		2	-2260.26
	3	-256.923		3	-2138.47
	4	-227.091		4	-2020.25
	5	-199.604		5	-1905.59
	6	-174.419		6	-1794.51
	7	-151.498		7	-1687.03
	8	-130.77		8	-1583.16
	9	-112.161		9	-1482.9
	10	-95.5667		10	-1386.28
	11	-80.8758		11	-1293.29
	12	-67.9574		12	-1203.93
	13	-56.676		13	-1118.22
	14	-46.8892		14	-1036.13
	15	-38.4549		15	-957.678
	16	-31.2366		16	-882.85
	17	-25.1073		17	-811.631
	18	-19.9479		18	-744.001
	19	-15.6455		19	-679.939
	20	-12.0937		20	-619.417
	21	-9.1939		21	-562.4
	22	-6.8559		22	-508.846
	23	-4.9989		23	-458.707
	24	-3.5491		24	-411.921
	25	-2.4401		25	-368.426
	26	-1.6127		26	-328.146
	27	-1.0135		27	-290.997
	28	-0.5954		28	-256.886
	29	-0.3829		29	-225.709
	30	-0.3114		30	-197.353
	31	-0.1571		31	-171.693
	32	-0.07		32	-148.589
				33	-127.895
				34	-109.454
				35	-93.104
				36	-78.6836
				37	-66.0335
				38	-54.9968
				39	-45.4245
				40	-37.176
				41	-30.1201
				42	-24.1346
				43	-19.1037
				44	-14.917
				45	-11.4698
				46	-8.6657
				47	-6.4152
				48	-4.6372
				49	-3.2599
				50	-2.2142
				51	-1.4419
				52	-0.8895

## Sheet: Ge+-Kr
Vibrational levels used for the Birge-Sponer-like analysis of (74)Ge+-(84)Kr
Using the extrapolated basis set (EBS) RCCSD(T) potentials for 2Sig and 2Pi (non-spin-orbit)
Vibrational level energy given in cm-1
	2Sig			2Pi
	v	E(v) / cm-1		v	E(v) / cm-1
	0	-535.243		0	-3802.78
	1	-499.66		1	-3676.16
	2	-465.495		2	-3551.7
	3	-432.753		3	-3429.4
	4	-401.429		4	-3309.28
	5	-371.526		5	-3191.34
	6	-343.037		6	-3075.6
	7	-315.954		7	-2962.07
	8	-290.277		8	-2850.75
	9	-265.989		9	-2741.65
	10	-243.073		10	-2634.78
	11	-221.52		11	-2530.15
	12	-201.302		12	-2427.77
	13	-182.393		13	-2327.64
	14	-164.772		14	-2229.77
	15	-148.394		15	-2134.17
	16	-133.231		16	-2040.85
	17	-119.238		17	-1949.81
	18	-106.364		18	-1861.05
	19	-94.5626		19	-1774.58
	20	-83.7804		20	-1690.41
	21	-73.9604		21	-1608.53
	22	-65.0482		22	-1528.96
	23	-56.984		23	-1451.69
	24	-49.7127		24	-1376.73
	25	-43.1781		25	-1304.07
	26	-37.3256		26	-1233.72
	27	-32.1033		27	-1165.67
	28	-27.4611		28	-1099.91
	29	-23.3515		29	-1036.45
	30	-19.7306		30	-975.27
	31	-16.5546		31	-916.363
	32	-13.7838		32	-859.72
	33	-11.3812		33	-805.328
	34	-9.308		34	-753.169
	35	-7.5369		35	-703.225
	36	-6.0309		36	-655.472
	37	-4.7643		37	-609.89
	38	-3.7077		38	-566.453
	39	-2.8374		39	-525.132
	40	-2.1285		40	-485.891
	41	-1.5605		41	-448.694
	42	-1.1119		42	-413.507
	43	-0.767		43	-380.285
	44	-0.5102		44	-348.979
	45	-0.3114		45	-319.541
	46	-0.176		46	-291.927
	47	-0.0835		47	-266.08
	48	-0.0234		48	-241.937
				49	-219.446
				50	-198.545
				51	-179.166
				52	-161.249
				53	-144.722
				54	-129.518
				55	-115.568
				56	-102.799
				57	-91.1464
				58	-80.5363
				59	-70.9054
				60	-62.187
				61	-54.3186
				62	-47.2401
				63	-40.893
				64	-35.2223
				65	-30.1752
				66	-25.7014
				67	-21.754
				68	-18.2877
				69	-15.2591
				70	-12.6293
				71	-10.3579
				72	-8.4124
				73	-6.7565
				74	-5.3596
				75	-4.1922
				76	-3.2269
				77	-2.4386
				78	-1.8032
				79	-1.2991
				80	-0.9077
				81	-0.6132
				82	-0.3893
				83	-0.2276
				84	-0.1175
				85	-0.0445
				86	-0.0013

## Sheet: Ge+-Xe
Vibrational levels used for the Birge-Sponer-like analysis of (74)Ge+-(132)Xe
Using the extrapolated basis set (EBS) RCCSD(T) potentials for 2Sig and 2Pi (non-spin-orbit)
Vibrational level energy given in cm-1
	2Sig			2Pi
	v	E(v) / cm-1		v	E(v) / cm-1
	0	-842.646		0	-5791.46
	1	-803.358		1	-5657.7
	2	-765.145		2	-5525.42
	3	-728.013		3	-5394.61
	4	-691.958		4	-5265.29
	5	-656.976		5	-5137.47
	6	-623.062		6	-5011.14
	7	-590.218		7	-4886.33
	8	-558.444		8	-4763.03
	9	-527.734		9	-4641.26
	10	-498.083		10	-4521.01
	11	-469.489		11	-4402.3
	12	-441.946		12	-4285.13
	13	-415.45		13	-4169.51
	14	-389.995		14	-4055.44
	15	-365.572		15	-3942.94
	16	-342.17		16	-3832.01
	17	-319.781		17	-3722.65
	18	-298.397		18	-3614.88
	19	-278.003		19	-3508.7
	20	-258.583		20	-3404.11
	21	-240.125		21	-3301.13
	22	-222.613		22	-3199.77
	23	-206.025		23	-3100.02
	24	-190.345		24	-3001.9
	25	-175.549		25	-2905.41
	26	-161.612		26	-2810.56
	27	-148.511		27	-2717.36
	28	-136.219		28	-2625.81
	29	-124.704		29	-2535.92
	30	-113.944		30	-2447.69
	31	-103.901		31	-2361.14
	32	-94.551		32	-2276.27
	33	-85.8591		33	-2193.09
	34	-77.7947		34	-2111.59
	35	-70.3258		35	-2031.79
	36	-63.4238		36	-1953.7
	37	-57.0548		37	-1877.3
	38	-51.1937		38	-1802.62
	39	-45.8066		39	-1729.65
	40	-40.8696		40	-1658.39
	41	-36.3553		41	-1588.86
	42	-32.2348		42	-1521.05
	43	-28.4871		43	-1454.96
	44	-25.0829		44	-1390.6
	45	-22.0024		45	-1327.96
	46	-19.2212		46	-1267.05
	47	-16.7233		47	-1207.86
	48	-14.4833		48	-1150.39
	49	-12.484		49	-1094.64
	50	-10.7055		50	-1040.6
	51	-9.1326		51	-988.265
	52	-7.7467		52	-937.633
	53	-6.5297		53	-888.691
	54	-5.4716		54	-841.43
	55	-4.5545		55	-795.84
	56	-3.7666		56	-751.907
	57	-3.094		57	-709.618
	58	-2.5254		58	-668.956
	59	-2.0489		59	-629.901
	60	-1.6557		60	-592.435
	61	-1.3363		61	-556.535
	62	-1.0725		62	-522.179
	63	-0.8626		63	-489.34
	64	-0.7012		64	-457.991
	65	-0.5779		65	-428.102
	66	-0.486		66	-399.645
	67	-0.4205		67	-372.586
	68	-0.3751		68	-346.892
	69	-0.345		69	-322.526
	70	-0.3272		70	-299.454
	71	-0.3168		71	-277.639
				72	-257.038
				73	-237.614
				74	-219.329
				75	-202.139
				76	-186.002
				77	-170.878
				78	-156.721
				79	-143.491
				80	-131.146
				81	-119.642
				82	-108.941
				83	-98.9992
				84	-89.7799
				85	-81.2441
				86	-73.3544
				87	-66.0766
				88	-59.3712
				89	-53.2085
				90	-47.5547
				91	-42.3779
				92	-37.6533
				93	-33.3481
				94	-29.4334
				95	-25.8851
				96	-22.6795
				97	-19.7878
				98	-17.195
				99	-14.8745
				100	-12.8063
				101	-10.968
				102	-9.345
				103	-7.9165
				104	-6.6652
				105	-5.5785
				106	-4.6378
				107	-3.8313
				108	-3.1433
				109	-2.5628
				110	-2.0768
				111	-1.6758
				112	-1.3494
				113	-1.0816
				114	-0.8698
				115	-0.7063
				116	-0.5809
				117	-0.4883
				118	-0.4215
				119	-0.3755
				120	-0.3451
				121	-0.3269
				122	-0.3165

## Sheet: Ge+-Rn
Vibrational levels used for the Birge-Sponer-like analysis of (74)Ge+-(222)Rn
Using the extrapolated basis set (EBS) RCCSD(T) potentials for 2Sig and 2Pi (non-spin-orbit)
Vibrational level energy given in cm-1
	2Sig			2Pi
	v	E(v) / cm-1		v	E(v) / cm-1
	0	-1098.92		0	-6936.8
	1	-1057.41		1	-6805.84
	2	-1016.84		2	-6676.02
	3	-977.199		3	-6547.36
	4	-938.486		4	-6419.86
	5	-900.695		5	-6293.51
	6	-863.822		6	-6168.34
	7	-827.863		7	-6044.33
	8	-792.817		8	-5921.51
	9	-758.681		9	-5799.86
	10	-725.449		10	-5679.4
	11	-693.119		11	-5560.14
	12	-661.684		12	-5442.06
	13	-631.143		13	-5325.19
	14	-601.49		14	-5209.52
	15	-572.724		15	-5095.05
	16	-544.837		16	-4981.8
	17	-517.824		17	-4869.77
	18	-491.68		18	-4758.96
	19	-466.4		19	-4649.37
	20	-441.976		20	-4541.02
	21	-418.402		21	-4433.91
	22	-395.671		22	-4328.04
	23	-373.777		23	-4223.42
	24	-352.71		24	-4120.06
	25	-332.456		25	-4017.95
	26	-313.009		26	-3917.1
	27	-294.361		27	-3817.51
	28	-276.498		28	-3719.2
	29	-259.404		29	-3622.17
	30	-243.071		30	-3526.42
	31	-227.486		31	-3431.96
	32	-212.63		32	-3338.8
	33	-198.487		33	-3246.94
	34	-185.046		34	-3156.39
	35	-172.284		35	-3067.16
	36	-160.184		36	-2979.24
	37	-148.73		37	-2892.64
	38	-137.898		38	-2807.37
	39	-127.669		39	-2723.44
	40	-118.027		40	-2640.85
	41	-108.943		41	-2559.61
	42	-100.403		42	-2479.72
	43	-92.3833		43	-2401.19
	44	-84.8609		44	-2324.02
	45	-77.8175		45	-2248.21
	46	-71.2295		46	-2173.77
	47	-65.0798		47	-2100.71
	48	-59.3436		48	-2029.02
	49	-54.0049		49	-1958.71
	50	-49.0418		50	-1889.79
	51	-44.4368		51	-1822.25
	52	-40.1727		52	-1756.11
	53	-36.2258		53	-1691.36
	54	-32.5821		54	-1628.01
	55	-29.2264		55	-1566.05
	56	-26.1402		56	-1505.5
	57	-23.3078		57	-1446.36
	58	-20.7149		58	-1388.62
	59	-18.3494		59	-1332.29
	60	-16.1964		60	-1277.36
	61	-14.2383		61	-1223.83
	62	-12.4636		62	-1171.7
	63	-10.8644		63	-1120.97
	64	-9.4252		64	-1071.64
	65	-8.1323		65	-1023.7
	66	-6.9792		66	-977.156
	67	-5.955		67	-932.009
	68	-5.0455		68	-888.242
	69	-4.2472		69	-845.843
	70	-3.5465		70	-804.802
	71	-2.9362		71	-765.113
	72	-2.4088		72	-726.766
	73	-1.9555		73	-689.747
	74	-1.5735		74	-654.044
	75	-1.2591		75	-619.64
	76	-0.9795		76	-586.52
	77	-0.7444		77	-554.664
	78	-0.5591		78	-524.054
	79	-0.4106		79	-494.673
	80	-0.293		80	-466.498
	81	-0.1989		81	-439.505
	82	-0.1307		82	-413.669
	83	-0.0805		83	-388.969
	84	-0.0409		84	-365.378
	85	-0.0167		85	-342.87
	86	-0.002		86	-321.414
				87	-300.985
				88	-281.556
				89	-263.096
				90	-245.572
				91	-228.958
				92	-213.225
				93	-198.337
				94	-184.266
				95	-170.984
				96	-158.455
				97	-146.652
				98	-135.546
				99	-125.103
				100	-115.298
				101	-106.104
				102	-97.4891
				103	-89.4324
				104	-81.9012
				105	-74.8743
				106	-68.3233
				107	-62.2291
				108	-56.5601
				109	-51.3058
				110	-46.4349
				111	-41.9322
				112	-37.7731
				113	-33.9342
				114	-30.4101
				115	-27.1685
				116	-24.1997
				117	-21.4884
				118	-19.0163
				119	-16.7688
				120	-14.7282
				121	-12.8812
				122	-11.219
				123	-9.7245
				124	-8.3842
				125	-7.1906
				126	-6.131
				127	-5.1919
				128	-4.3681
				129	-3.6457
				130	-3.0175
				131	-2.4747
				132	-2.0088
				133	-1.6154
				134	-1.2906
				135	-1.0054
				136	-0.7651
				137	-0.5753
				138	-0.4227
				139	-0.302
				140	-0.206
				141	-0.1353
				142	-0.0838
				143	-0.0434
				144	-0.0177
				145	-0.0027

## Sheet: Si+-He
Vibrational levels used for the Birge-Sponer-like analysis of (28)Si+-(4)He
Using the extrapolated basis set (EBS) RCCSD(T) potentials for 2Pi1/2, 2Pi3/2 and 2Sig1/2 of W. D. Tuttle, R. L. Thorington, L. A. Viehland and T. G. Wright, Mol. Phys., 2017, 115, 437. DOI: 10.1080/00268976.2016.1269965; calculated for this work
Vibrational level energy given in cm-1
	2Sig			2Pi
	v	E(v) / cm-1		v	E(v) / cm-1
	0	-28.5136		0	-193.285
	1	-8.5305		1	-108.649
				2	-51.8532
				3	-19.8367
				4	-5.5262

## Sheet: Si+-Ne
Vibrational levels used for the Birge-Sponer-like analysis of (28)Si+-(20)Ne
Using the extrapolated basis set (EBS) RCCSD(T) potentials for 2Pi1/2, 2Pi3/2 and 2Sig1/2 of W. D. Tuttle, R. L. Thorington, L. A. Viehland and T. G. Wright, Mol. Phys., 2017, 115, 437. DOI: 10.1080/00268976.2016.1269965; calculated for this work
Vibrational level energy given in cm-1
	2Sig			2Pi
	v	E(v) / cm-1		v	E(v) / cm-1
	0	-86.6834		0	-492.147
	1	-59.9627		1	-407.701
	2	-39.6546		2	-332.075
	3	-24.9384		3	-265.253
	4	-14.7912		4	-207.189
	5	-8.1679		5	-157.791
	6	-4.1194		6	-116.863
	7	-1.8264		7	-83.9809
	8	-0.665		8	-58.379
	9	-0.1731		9	-39.0356
	10	-0.0224		10	-24.8849
				11	-14.9394
				12	-8.3328
				13	-4.233
				14	-1.8817
				15	-0.6857
				16	-0.1789
				17	-0.0234

## Sheet: Si+-Ar
Vibrational levels used for the Birge-Sponer-like analysis of (28)Si+-(40)Ar
Using the extrapolated basis set (EBS) RCCSD(T) potentials for 2Pi1/2, 2Pi3/2 and 2Sig1/2 of W. D. Tuttle, R. L. Thorington, L. A. Viehland and T. G. Wright, Mol. Phys., 2017, 115, 437. DOI: 10.1080/00268976.2016.1269965; calculated for this work
Vibrational level energy given in cm-1
	2Sig			2Pi
	v	E(v) / cm-1		v	E(v) / cm-1
	0	-368.796		0	-2687.14
	1	-322.001		1	-2524.16
	2	-278.981		2	-2366.42
	3	-239.733		3	-2213.93
	4	-204.234		4	-2066.73
	5	-172.428		5	-1924.86
	6	-144.217		6	-1788.34
	7	-119.459		7	-1657.19
	8	-97.9613		8	-1531.44
	9	-79.4939		9	-1411.11
	10	-63.7932		10	-1296.2
	11	-50.579		11	-1186.73
	12	-39.5712		12	-1082.7
	13	-30.504		13	-984.102
	14	-23.1289		14	-890.936
	15	-17.2113		15	-803.18
	16	-12.5329		16	-720.805
	17	-8.8961		17	-643.773
	18	-6.1254		18	-572.032
	19	-4.0654		19	-505.518
	20	-2.5787		20	-444.152
	21	-1.5448		21	-387.84
	22	-0.8594		22	-336.472
	23	-0.4326		23	-289.917
	24	-0.189		24	-248.021
	25	-0.0664		25	-210.601
	26	-0.016		26	-177.44
				27	-148.285
				28	-122.858
				29	-100.859
				30	-81.978
				31	-65.908
				32	-52.3496
				33	-41.0221
				34	-31.665
				35	-24.0342
				36	-17.8977
				37	-13.0378
				38	-9.2562
				39	-6.374
				40	-4.2312
				41	-2.6852
				42	-1.6104
				43	-0.8978
				44	-0.4537
				45	-0.1995
				46	-0.071
				47	-0.0175

## Sheet: Si+-Kr
Vibrational levels used for the Birge-Sponer-like analysis of (28)Si+-(84)Kr
Using the extrapolated basis set (EBS) RCCSD(T) potentials for 2Sig and 2Pi (non-spin-orbit)
Vibrational level energy given in cm-1
	2Sig			2Pi
	v	E(v) / cm-1		v	E(v) / cm-1
	0	-555.99		0	-4215.65
	1	-506.688		1	-4036.36
	2	-460.025		2	-3860.89
	3	-416.009		3	-3689.27
	4	-374.64		4	-3521.52
	5	-335.907		5	-3357.67
	6	-299.801		6	-3197.76
	7	-266.301		7	-3041.82
	8	-235.378		8	-2889.86
	9	-206.981		9	-2741.93
	10	-181.049		10	-2598.05
	11	-157.506		11	-2458.23
	12	-136.255		12	-2322.51
	13	-117.188		13	-2190.9
	14	-100.181		14	-2063.42
	15	-85.1038		15	-1940.1
	16	-71.8182		16	-1820.94
	17	-60.1816		17	-1705.96
	18	-50.0508		18	-1595.18
	19	-41.2852		19	-1488.59
	20	-33.7495		20	-1386.21
	21	-27.3157		21	-1288.02
	22	-21.8646		22	-1194.04
	23	-17.2846		23	-1104.24
	24	-13.4733		24	-1018.63
	25	-10.3347		25	-937.192
	26	-7.7822		26	-859.895
	27	-5.7349		27	-786.693
	28	-4.12		28	-717.552
	29	-2.8696		29	-652.442
	30	-1.9239		30	-591.31
	31	-1.2277		31	-534.099
	32	-0.7316		32	-480.704
	33	-0.393		33	-431.036
	34	-0.1763		34	-385.027
	35	-0.0457		35	-342.553
				36	-303.513
				37	-267.774
				38	-235.202
				39	-205.65
				40	-178.958
				41	-154.961
				42	-133.484
				43	-114.354
				44	-97.3967
				45	-82.4389
				46	-69.3147
				47	-57.861
				48	-47.9222
				49	-39.3507
				50	-32.0074
				51	-25.7618
				52	-20.4929
				53	-16.0884
				54	-12.4434
				55	-9.4612
				56	-7.0534
				57	-5.1388
				58	-3.6425
				59	-2.497
				60	-1.6412
				61	-1.0205
				62	-0.585
				63	-0.2973
				64	-0.1158
				65	-0.0117

[truncated: 2 more sheets: Si+-Xe, Si+-Rn]
