# Supplementary material for: Interactions of Si+(2PJ) and Ge+ (2PJ) with rare gas atoms (He–Rn): interaction potentials, spectroscopy, and ion transport coefficients
Source: Royal Society of Chemistry journal article supplement (doi:10.1039/d1cp05710c), 2022-01-01
Supplement: d1cp05710c3.xlsx [file d1cp05710c3.xlsx]

## Sheet: Ge+-He
Using the extrapolated basis set (EBS) RCCSD(T) potentials for 2Pi1/2, 2Pi3/2 and 2Sig1/2
Vibrational level energy given in cm-1
	2Pi1/2			2Pi3/2			2Sig1/2
	v	E(v) / cm-1		v	E(v) / cm-1		v	E(v) / cm-1
	0	-85.5117		0	-231.705		0	-39.6934
	1	-42.4968		1	-137.436		1	-14.3042
	2	-16.71		2	-71.3481		2	-3.6428
	3	-4.7266		3	-30.9512
	4	-0.7438		4	-10.5338
	5	-0.0209		5	-2.429
				6	-0.2414

## Sheet: Ge+-Ne
Using the extrapolated basis set (EBS) RCCSD(T) potentials for 2Pi1/2, 2Pi3/2 and 2Sig1/2
Vibrational level energy given in cm-1
	2Pi1/2			2Pi3/2			2Sig1/2
	v	E(v) / cm-1		v	E(v) / cm-1		v	E(v) / cm-1
	0	-273.236		0	-543.538		0	-119.382
	1	-228.439		1	-463.071		1	-90.2254
	2	-187.703		2	-389.741		2	-66.3662
	3	-151.281		3	-323.584		3	-47.3468
	4	-119.339		4	-264.612		4	-32.6141
	5	-91.9467		5	-212.785		5	-21.5906
	6	-69.0298		6	-167.983		6	-13.6479
	7	-50.3376		7	-129.989		7	-8.1573
	8	-35.497		8	-98.462		8	-4.5506
	9	-24.0853		9	-72.8905		9	-2.3169
	10	-15.6219		10	-52.588		10	-1.0365
	11	-9.5945		11	-36.8056		11	-0.3813
	12	-5.5146		12	-24.85		12	-0.1008
	13	-2.9114		13	-16.0679		13	-0.0133
	14	-1.3673		14	-9.8503
	15	-0.5411		15	-5.6561
	16	-0.1625		16	-2.9854
	17	-0.0288		17	-1.403
	18	-0.0009		18	-0.5566
				19	-0.1681
				20	-0.0302
				21	-0.0011

## Sheet: Ge+-Ar
Using the extrapolated basis set (EBS) RCCSD(T) potentials for 2Pi1/2, 2Pi3/2 and 2Sig1/2
Vibrational level energy given in cm-1
	2Pi1/2			2Pi3/2			2Sig1/2
	v	E(v) / cm-1		v	E(v) / cm-1		v	E(v) / cm-1
	0	-2028.61		0	-2515.42		0	-506.445
	1	-1907.29		1	-2386.36		1	-458.747
	2	-1790.12		2	-2260.8		2	-414.01
	3	-1677.16		3	-2138.79		3	-372.187
	4	-1568.48		4	-2020.33		4	-333.231
	5	-1464.15		5	-1905.44		5	-297.085
	6	-1364.2		6	-1794.14		6	-263.686
	7	-1268.66		7	-1686.44		7	-232.973
	8	-1177.55		8	-1582.34		8	-204.87
	9	-1090.87		9	-1481.86		9	-179.3
	10	-1008.56		10	-1385.02		10	-156.168
	11	-930.572		11	-1291.81		11	-135.369
	12	-856.799		12	-1202.25		12	-116.781
	13	-787.134		13	-1116.32		13	-100.274
	14	-721.449		14	-1034.03		14	-85.7019
	15	-659.601		15	-955.367		15	-72.8927
	16	-601.444		16	-880.337		16	-61.5576
	17	-546.843		17	-808.917		17	-51.3987
	18	-495.666		18	-741.09		18	-42.5112
	19	-447.789		19	-676.835		19	-34.8076
	20	-403.1		20	-616.124		20	-28.2025
	21	-361.492		21	-558.92		21	-22.5768
	22	-322.866		22	-505.185		22	-17.8453
	23	-287.128		23	-454.867		23	-13.909
	24	-254.187		24	-407.909		24	-10.6698
	25	-223.952		25	-364.246		25	-8.0373
	26	-196.329		26	-323.803		26	-5.9292
	27	-171.218		27	-286.497		27	-4.2688
	28	-148.509		28	-252.236		28	-2.9876
	29	-128.087		29	-220.914		29	-2.0211
	30	-109.821		30	-192.421		30	-1.3116
	31	-93.5759		31	-166.629		31	-0.8086
	32	-79.2097		32	-143.402		32	-0.4669
	33	-66.5792		33	-122.594		33	-0.2471
	34	-55.5397		34	-104.045		34	-0.1162
	35	-45.9497		35	-87.5972		35	-0.0454
	36	-37.6729		36	-73.095		36	-0.0129
	37	-30.5818		37	-60.4558
	38	-24.5568		38	-49.7443
	39	-19.4843		39	-40.7115
	40	-15.2555		40	-33.0015
	41	-11.767		41	-26.4986
	42	-8.9232		42	-21.0501
	43	-6.6353		43	-16.5131
	44	-4.8231		44	-12.7734
	45	-3.4146		45	-9.7251
	46	-2.3414		46	-7.2698
	47	-1.5456		47	-5.3199
	48	-0.9733		48	-3.7967
	49	-0.5774		49	-2.6301
	50	-0.3168		50	-1.7581
	51	-0.1568		51	-1.1246
	52	-0.0662		52	-0.6806
	53	-0.0219		53	-0.3834
	54	-0.0044		54	-0.1966
				55	-0.0877
				56	-0.0318
				57	-0.0077

## Sheet: Ge+-Kr
Using the extrapolated basis set (EBS) RCCSD(T) potentials for 2Pi1/2, 2Pi3/2 and 2Sig1/2
Vibrational level energy given in cm-1
	2Pi1/2			2Pi3/2			2Sig1/2
	v	E(v) / cm-1		v	E(v) / cm-1		v	E(v) / cm-1
	0	-3289.56		0	-3796.63		0	-748.381
	1	-3166.44		1	-3670		1	-702.159
	2	-3045.68		2	-3545.52		2	-657.718
	3	-2927.29		3	-3423.21		3	-615.055
	4	-2811.31		4	-3303.08		4	-574.157
	5	-2697.76		5	-3185.13		5	-535.016
	6	-2586.66		6	-3069.37		6	-497.617
	7	-2478.04		7	-2955.83		7	-461.944
	8	-2371.92		8	-2844.5		8	-427.984
	9	-2268.33		9	-2735.39		9	-395.712
	10	-2167.29		10	-2628.51		10	-365.105
	11	-2068.82		11	-2523.86		11	-336.144
	12	-1972.96		12	-2421.47		12	-308.799
	13	-1879.72		13	-2321.33		13	-283.035
	14	-1789.12		14	-2223.45		14	-258.825
	15	-1701.18		15	-2127.84		15	-236.136
	16	-1615.91		16	-2034.51		16	-214.921
	17	-1533.32		17	-1943.46		17	-195.145
	18	-1453.42		18	-1854.69		18	-176.763
	19	-1376.21		19	-1768.21		19	-159.724
	20	-1301.69		20	-1684.04		20	-143.982
	21	-1229.84		21	-1602.16		21	-129.478
	22	-1160.64		22	-1522.58		22	-116.158
	23	-1094.07		23	-1445.31		23	-103.96
	24	-1030.1		24	-1370.34		24	-92.8248
	25	-968.702		25	-1297.68		25	-82.6812
	26	-909.82		26	-1227.32		26	-73.4176
	27	-853.414		27	-1159.26		27	-64.8613
	28	-799.433		28	-1093.51		28	-56.97
	29	-747.826		29	-1030.04		29	-49.8332
	30	-698.539		30	-968.86		30	-43.3606
	31	-651.517		31	-909.953		31	-37.5477
	32	-606.704		32	-853.311		32	-32.3307
	33	-564.043		33	-798.919		33	-27.68
	34	-523.486		34	-746.761		34	-23.5543
	35	-484.979		35	-696.818		35	-19.9096
	36	-448.467		36	-649.068		36	-16.7073
	37	-413.898		37	-603.488		37	-13.9115
	38	-381.224		38	-560.054		38	-11.4854
	39	-350.396		39	-518.736		39	-9.3945
	40	-321.358		40	-479.499		40	-7.6052
	41	-294.057		41	-442.307		41	-6.0869
	42	-268.452		42	-407.124		42	-4.81
	43	-244.487		43	-373.906		43	-3.7464
	44	-222.102		44	-342.606		44	-2.8717
	45	-201.253		45	-313.174		45	-2.1606
	46	-181.878		46	-285.565		46	-1.5916
	47	-163.919		47	-259.723		47	-1.1439
	48	-147.323		48	-235.586		48	-0.8005
	49	-132.022		49	-213.101		49	-0.5443
	50	-117.957		50	-192.206		50	-0.3478
	51	-105.062		51	-172.833		51	-0.2145
	52	-93.2734		52	-154.921		52	-0.1236
	53	-82.5274		53	-138.4		53	-0.0653
	54	-72.7587		54	-123.202		54	-0.0305
	55	-63.9049		55	-109.257		55	-0.0134
	56	-55.9052		56	-96.4931
	57	-48.6992		57	-84.8469
	58	-42.2303		58	-74.2589
	59	-36.4439		59	-64.7435
	60	-31.2864		60	-56.3561
	61	-26.7081		61	-48.9116
	62	-22.6622		62	-42.2655
	63	-19.1034		63	-36.3685
	64	-15.988		64	-31.1443
	65	-13.2772		65	-26.5237
	66	-10.9308		66	-22.4598
	67	-8.9153		67	-18.8994
	68	-7.1957		68	-15.7912
	69	-5.7404		69	-13.0936
	70	-4.5208		70	-10.7638
	71	-3.5077		71	-8.7672
	72	-2.6777		72	-7.0674
	73	-2.0049		73	-5.631
	74	-1.4688		74	-4.4293
	75	-1.0492		75	-3.4323
	76	-0.73		76	-2.6168
	77	-0.4909		77	-1.9564
	78	-0.3101		78	-1.431
	79	-0.1886		79	-1.0205
	80	-0.1067		80	-0.7091
	81	-0.0561		81	-0.4751
	82	-0.0247		82	-0.2993
	83	-0.0116		83	-0.1813
				84	-0.1018
				85	-0.0538
				86	-0.0233
				87	-0.0112

## Sheet: Ge+-Xe
Using the extrapolated basis set (EBS) RCCSD(T) potentials for 2Pi1/2, 2Pi3/2 and 2Sig1/2
Vibrational level energy given in cm-1
	2Pi1/2			2Pi3/2			2Sig1/2
	v	E(v) / cm-1		v	E(v) / cm-1		v	E(v) / cm-1
	0	-5271.15		0	-5757.09		0	-1160.79
	1	-5138.83		1	-5623.69		1	-1110.95
	2	-5008.06		2	-5491.76		2	-1062.28
	3	-4878.85		3	-5361.32		3	-1014.81
	4	-4751.2		4	-5232.36		4	-968.532
	5	-4625.14		5	-5104.89		5	-923.473
	6	-4500.67		6	-4978.92		6	-879.641
	7	-4377.8		7	-4854.46		7	-837.046
	8	-4256.55		8	-4731.52		8	-795.694
	9	-4136.92		9	-4610.09		9	-755.59
	10	-4018.93		10	-4490.2		10	-716.737
	11	-3902.59		11	-4371.84		11	-679.141
	12	-3787.91		12	-4255.02		12	-642.799
	13	-3674.9		13	-4139.75		13	-607.708
	14	-3563.58		14	-4026.03		14	-573.866
	15	-3453.96		15	-3913.88		15	-541.265
	16	-3346.05		16	-3803.29		16	-509.9
	17	-3239.87		17	-3694.28		17	-479.76
	18	-3135.43		18	-3586.86		18	-450.837
	19	-3032.74		19	-3481.03		19	-423.117
	20	-2931.82		20	-3376.79		20	-396.585
	21	-2832.68		21	-3274.16		21	-371.223
	22	-2735.34		22	-3173.14		22	-347.019
	23	-2639.81		23	-3073.74		23	-323.953
	24	-2546.1		24	-2975.96		24	-302.002
	25	-2454.24		25	-2879.82		25	-281.145
	26	-2364.23		26	-2785.32		26	-261.361
	27	-2276.08		27	-2692.46		27	-242.625
	28	-2189.81		28	-2601.26		28	-224.909
	29	-2105.44		29	-2511.71		29	-208.187
	30	-2022.96		30	-2423.84		30	-192.432
	31	-1942.4		31	-2337.63		31	-177.61
	32	-1863.77		32	-2253.11		32	-163.692
	33	-1787.06		33	-2170.27		33	-150.645
	34	-1712.29		34	-2089.12		34	-138.434
	35	-1639.46		35	-2009.67		35	-127.028
	36	-1568.56		36	-1931.92		36	-116.389
	37	-1499.61		37	-1855.87		37	-106.486
	38	-1432.59		38	-1781.53		38	-97.2811
	39	-1367.51		39	-1708.91		39	-88.7282
	40	-1304.36		40	-1638		40	-80.7456
	41	-1243.13		41	-1568.81		41	-73.2272
	42	-1183.8		42	-1501.35		42	-66.1805
	43	-1126.37		43	-1435.61		43	-59.6684
	44	-1070.81		44	-1371.59		44	-53.6219
	45	-1017.1		45	-1309.3		45	-48.0549
	46	-965.238		46	-1248.73		46	-42.919
	47	-915.186		47	-1189.88		47	-38.2164
	48	-866.924		48	-1132.75		48	-33.9086
	49	-820.428		49	-1077.34		49	-29.9751
	50	-775.668		50	-1023.64		50	-26.3969
	51	-732.618		51	-971.639		51	-23.1526
	52	-691.25		52	-921.34		52	-20.2144
	53	-651.533		53	-872.73		53	-17.5714
	54	-613.437		54	-825.799		54	-15.198
	55	-576.93		55	-780.535		55	-13.0764
	56	-541.98		56	-736.926		56	-11.1855
	57	-508.555		57	-694.957		57	-9.5099
	58	-476.622		58	-654.611		58	-8.032
	59	-446.148		59	-615.868		59	-6.7324
	60	-417.097		60	-578.71		60	-5.5997
	61	-389.435		61	-543.114		61	-4.6169
	62	-363.13		62	-509.056		62	-3.7705
	63	-338.145		63	-476.509		63	-3.0468
	64	-314.443		64	-445.447		64	-2.4335
	65	-291.989		65	-415.84		65	-1.918
	66	-270.748		66	-387.658		66	-1.4904
	67	-250.681		67	-360.868		67	-1.1408
	68	-231.749		68	-335.435		68	-0.8547
	69	-213.917		69	-311.324		69	-0.6241
	70	-197.147		70	-288.5		70	-0.4461
	71	-181.395		71	-266.924		71	-0.3083
	72	-166.626		72	-246.555		72	-0.2051
	73	-152.798		73	-227.357		73	-0.1305
	74	-139.87		74	-209.288		74	-0.0777
	75	-127.805		75	-192.306		75	-0.0427
	76	-116.559		76	-176.37		76	-0.0207
	77	-106.098		77	-161.437		77	-0.008
	78	-96.379		78	-147.464
	79	-87.365		79	-134.411
	80	-79.0202		80	-122.232
	81	-71.3068		81	-110.888
	82	-64.192		82	-100.339
	83	-57.6382		83	-90.5424
	84	-51.615		84	-81.4797
	85	-46.0901		85	-73.1736
	86	-41.032		86	-65.6678
	87	-36.4163		87	-58.8276
	88	-32.2106		88	-52.5603
	89	-28.3871		89	-46.8543
	90	-24.9224		90	-41.6489
	91	-21.7921		91	-36.9126
	92	-18.9692		92	-32.6148
	93	-16.4381		93	-28.7184
	94	-14.1735		94	-25.1921
	95	-12.1551		95	-22.0139
	96	-10.3618		96	-19.1536
	97	-8.779		97	-16.5928
	98	-7.386		98	-14.3027
	99	-6.1664		99	-12.2637
	100	-5.1077		100	-10.4541
	101	-4.1915		101	-8.8579
	102	-3.4066		102	-7.4545
	103	-2.7373		103	-6.2252
	104	-2.1732		104	-5.1585
	105	-1.7013		105	-4.2353
	106	-1.3128		106	-3.4441
	107	-0.997		107	-2.7695
	108	-0.7372		108	-2.2005
	109	-0.533		109	-1.7242
	110	-0.3753		110	-1.332
	111	-0.2551		111	-1.0135
	112	-0.1664		112	-0.7508
	113	-0.1029		113	-0.5432
	114	-0.0594		114	-0.3833
	115	-0.0308		115	-0.2613
	116	-0.014		116	-0.1708
	117	-0.0042		117	-0.1062
				118	-0.0616
				119	-0.0322
				120	-0.0148
				121	-0.0048

## Sheet: Ge+-Rn
Using the extrapolated basis set (EBS) RCCSD(T) potentials for 2Pi1/2, 2Pi3/2 and 2Sig1/2
Vibrational level energy given in cm-1
	2Pi1/2			2Pi3/2			2Sig1/2
	v	E(v) / cm-1		v	E(v) / cm-1		v	E(v) / cm-1
	0	-6538.79		0	-6766.45		0	-1520.03
	1	-6406.49		1	-6637.29		1	-1468.42
	2	-6275.41		2	-6509.26		2	-1417.69
	3	-6145.56		3	-6382.38		3	-1367.85
	4	-6016.94		4	-6256.65		4	-1318.9
	5	-5889.56		5	-6132.08		5	-1270.87
	6	-5763.43		6	-6008.67		6	-1223.76
	7	-5638.55		7	-5886.43		7	-1177.59
	8	-5514.93		8	-5765.36		8	-1132.37
	9	-5392.58		9	-5645.47		9	-1088.11
	10	-5271.49		10	-5526.76		10	-1044.83
	11	-5151.69		11	-5409.23		11	-1002.52
	12	-5033.17		12	-5292.9		12	-961.211
	13	-4915.94		13	-5177.76		13	-920.901
	14	-4800		14	-5063.82		14	-881.596
	15	-4685.37		15	-4951.08		15	-843.302
	16	-4572.05		16	-4839.56		16	-806.024
	17	-4460.05		17	-4729.24		17	-769.768
	18	-4349.38		18	-4620.15		18	-734.538
	19	-4240.04		19	-4512.29		19	-700.334
	20	-4132.04		20	-4405.65		20	-667.154
	21	-4025.39		21	-4300.25		21	-634.995
	22	-3920.11		22	-4196.09		22	-603.856
	23	-3816.2		23	-4093.18		23	-573.733
	24	-3713.66		24	-3991.52		24	-544.621
	25	-3612.51		25	-3891.11		25	-516.513
	26	-3512.75		26	-3791.96		26	-489.401
	27	-3414.4		27	-3694.08		27	-463.274
	28	-3317.46		28	-3597.46		28	-438.125
	29	-3221.95		29	-3502.13		29	-413.944
	30	-3127.87		30	-3408.08		30	-390.715
	31	-3035.23		31	-3315.33		31	-368.423
	32	-2944.05		32	-3223.87		32	-347.056
	33	-2854.34		33	-3133.71		33	-326.6
	34	-2766.11		34	-3044.86		34	-307.038
	35	-2679.37		35	-2957.32		35	-288.348
	36	-2594.12		36	-2871.1		36	-270.514
	37	-2510.38		37	-2786.2		37	-253.522
	38	-2428.15		38	-2702.63		38	-237.346
	39	-2347.46		39	-2620.4		39	-221.965
	40	-2268.3		40	-2539.51		40	-207.361
	41	-2190.68		41	-2459.97		41	-193.512
	42	-2114.62		42	-2381.78		42	-180.391
	43	-2040.12		43	-2304.95		43	-167.978
	44	-1967.18		44	-2229.48		44	-156.251
	45	-1895.82		45	-2155.37		45	-145.179
	46	-1826.03		46	-2082.63		46	-134.746
	47	-1757.81		47	-2011.26		47	-124.923
	48	-1691.17		48	-1941.26		48	-115.686
	49	-1626.12		49	-1872.65		49	-107.015
	50	-1562.64		50	-1805.42		50	-98.8774
	51	-1500.74		51	-1739.58		51	-91.2404
	52	-1440.42		52	-1675.13		52	-84.0302
	53	-1381.67		53	-1612.07		53	-77.1798
	54	-1324.49		54	-1550.4		54	-70.7144
	55	-1268.87		55	-1490.13		55	-64.6743
	56	-1214.81		56	-1431.26		56	-59.0059
	57	-1162.28		57	-1373.8		57	-53.7251
	58	-1111.29		58	-1317.74		58	-48.7981
	59	-1061.81		59	-1263.08		59	-44.2248
	60	-1013.84		60	-1209.81		60	-39.9772
	61	-967.347		61	-1157.94		61	-36.043
	62	-922.329		62	-1107.46		62	-32.4077
	63	-878.773		63	-1058.37		63	-29.0587
	64	-836.664		64	-1010.68		64	-25.974
	65	-795.977		65	-964.377		65	-23.1451
	66	-756.686		66	-919.465		66	-20.5572
	67	-718.77		67	-875.929		67	-18.1957
	68	-682.21		68	-833.755		68	-16.0448
	69	-646.985		69	-792.935		69	-14.0896
	70	-613.071		70	-753.463		70	-12.3212
	71	-580.444		71	-715.328		71	-10.7284
	72	-549.081		72	-678.517		72	-9.2944
	73	-518.954		73	-643.015		73	-8.0094
	74	-490.039		74	-608.809		74	-6.8657
	75	-462.314		75	-575.881		75	-5.8489
	76	-435.753		76	-544.213		76	-4.9496
	77	-410.326		77	-513.787		77	-4.161
	78	-386.005		78	-484.584		78	-3.4692
	79	-362.767		79	-456.582		79	-2.8697
	80	-340.586		80	-429.756		80	-2.3508
	81	-319.433		81	-404.084		81	-1.9081
	82	-299.276		82	-379.541		82	-1.5358
	83	-280.091		83	-356.103		83	-1.2266
	84	-261.853		84	-333.742		84	-0.9518
	85	-244.529		85	-312.43		85	-0.7278
	86	-228.089		86	-292.139		86	-0.5494
	87	-212.51		87	-272.843		87	-0.4072
	88	-197.761		88	-254.511		88	-0.2941
	89	-183.809		89	-237.111		89	-0.205
	90	-170.629		90	-220.617		90	-0.1411
	91	-158.194		91	-204.998		91	-0.0928
	92	-146.468		92	-190.219		92	-0.056
	93	-135.43		93	-176.253		93	-0.0351
	94	-125.049		94	-163.072		94	-0.0204
	95	-115.294		95	-150.639
	96	-106.144		96	-138.929
	97	-97.567		97	-127.911
	98	-89.54		98	-117.552
	99	-82.0367		99	-107.828
	100	-75.0309		100	-98.7099
	101	-68.4992		101	-90.1742
	102	-62.4186		102	-82.2269
	103	-56.7627		103	-74.9025
	104	-51.5158		104	-68.1965
	105	-46.6505		105	-61.9769
	106	-42.1521		106	-56.2324
	107	-37.9937		107	-50.9233
	108	-34.1566		108	-46.0273
	109	-30.6281		109	-41.5107
	110	-27.3846		110	-37.3532
	111	-24.4112		111	-33.5281
	112	-21.6927		112	-30.0174
	113	-19.2131		113	-26.8005
	114	-16.9583		114	-23.8579
	115	-14.9097		115	-21.1722
	116	-13.0534		116	-18.7274
	117	-11.3813		117	-16.5083
	118	-9.878		118	-14.4954
	119	-8.5281		119	-12.6749
	120	-7.3241		120	-11.0377
	121	-6.2554		121	-9.5672
	122	-5.3068		122	-8.2487
	123	-4.4733		123	-7.0749
	124	-3.7428		124	-6.0338
	125	-3.1055		125	-5.1109
	126	-2.5553		126	-4.3019
	127	-2.0812		127	-3.5927
	128	-1.6806		128	-2.9761
	129	-1.3492		129	-2.4435
	130	-1.0615		130	-1.9866
	131	-0.8141		131	-1.6016
	132	-0.6191		132	-1.2847
	133	-0.462		133	-1.0035
	134	-0.3381		134	-0.7678
	135	-0.2391		135	-0.5819
	136	-0.1652		136	-0.4329
	137	-0.1121		137	-0.315
	138	-0.0701		138	-0.2208
	139	-0.0421		139	-0.1526
	140	-0.0268		140	-0.1023
	141	-0.0133		141	-0.0627
				142	-0.0385
				143	-0.0238
				144	-0.0107

## Sheet: Si+-He
Using the extrapolated basis set (EBS) RCCSD(T) potentials for 2Pi1/2, 2Pi3/2 and 2Sig1/2 of W. D. Tuttle, R. L. Thorington, L. A. Viehland and T. G. Wright, Mol. Phys., 2017, 115, 437. DOI: 10.1080/00268976.2016.1269965; calculated for this work
Vibrational level energy given in cm-1
	2Pi1/2			2Pi3/2			2Sig1/2
	v	E(v) / cm-1		v	E(v) / cm-1		v	E(v) / cm-1
	0	-131.013		0	-193.435		0	-38.3523
	1	-68.4095		1	-108.754		1	-12.6763
	2	-30.0508		2	-51.9167
	3	-9.9184		3	-19.8674
	4	-2.0991		4	-5.5368
	5	-0.1624		5	-0.8543
				6	-0.021

## Sheet: Si+-Ne
Using the extrapolated basis set (EBS) RCCSD(T) potentials for 2Pi1/2, 2Pi3/2 and 2Sig1/2 of W. D. Tuttle, R. L. Thorington, L. A. Viehland and T. G. Wright, Mol. Phys., 2017, 115, 437. DOI: 10.1080/00268976.2016.1269965; calculated for this work
Vibrational level energy given in cm-1
	2Pi1/2			2Pi3/2			2Sig1/2
	v	E(v) / cm-1		v	E(v) / cm-1		v	E(v) / cm-1
	0	-415.092		0	-492.21		0	-109.923
	1	-334.725		1	-407.756		1	-77.4527
	2	-264.9		2	-332.123		2	-52.5544
	3	-205.796		3	-265.294		3	-34.1474
	4	-156.85		4	-207.224		4	-21.0828
	5	-116.845		5	-157.819		5	-12.2245
	6	-84.6195		6	-116.885		6	-6.5617
	7	-59.2484		7	-83.9966		7	-3.1789
	8	-39.8524		8	-58.39		8	-1.3249
	9	-25.5411		9	-39.0427		9	-0.4353
	10	-15.4217		10	-24.8889		10	-0.0916
	11	-8.6566		11	-14.9409
	12	-4.4339		12	-8.3324
	13	-1.9953		13	-4.2313
	14	-0.7396		14	-1.879
	15	-0.1972		15	-0.6824
	16	-0.0247		16	-0.1753
				17	-0.0197

## Sheet: Si+-Ar
Using the extrapolated basis set (EBS) RCCSD(T) potentials for 2Pi1/2, 2Pi3/2 and 2Sig1/2 of W. D. Tuttle, R. L. Thorington, L. A. Viehland and T. G. Wright, Mol. Phys., 2017, 115, 437. DOI: 10.1080/00268976.2016.1269965; calculated for this work
Vibrational level energy given in cm-1
	2Pi1/2			2Pi3/2			2Sig1/2
	v	E(v) / cm-1		v	E(v) / cm-1		v	E(v) / cm-1
	0	-2602.48		0	-2686.21		0	-427.326
	1	-2439.71		1	-2523.27		1	-375.735
	2	-2282.18		2	-2365.55		2	-327.875
	3	-2129.96		3	-2213.09		3	-283.856
	4	-1983.07		4	-2065.93		4	-243.729
	5	-1841.55		5	-1924.09		5	-207.497
	6	-1705.44		6	-1787.61		6	-175.103
	7	-1574.78		7	-1656.51		7	-146.433
	8	-1449.61		8	-1530.8		8	-121.314
	9	-1329.98		9	-1410.51		9	-99.526
	10	-1215.91		10	-1295.64		10	-80.8141
	11	-1107.45		11	-1186.2		11	-64.8987
	12	-1004.64		12	-1082.2		12	-51.4912
	13	-907.505		13	-983.629		13	-40.3098
	14	-816.089		14	-890.487		14	-31.0895
	15	-730.416		15	-802.754		15	-23.5823
	16	-650.501		16	-720.404		16	-17.5535
	17	-576.336		17	-643.396		17	-12.7837
	18	-507.881		18	-571.68		18	-9.074
	19	-445.051		19	-505.19		19	-6.2468
	20	-387.709		20	-443.846		20	-4.144
	21	-335.667		21	-387.558		21	-2.6259
	22	-288.717		22	-336.213		22	-1.5696
	23	-246.618		23	-289.681		23	-0.8685
	24	-209.121		24	-247.808		24	-0.4313
	25	-175.96		25	-210.41		25	-0.1809
	26	-146.852		26	-177.269		26	-0.0544
	27	-121.503		27	-148.133		27	-0.0024
	28	-99.6049		28	-122.724
	29	-80.8429		29	-100.741
	30	-64.9037		30	-81.8748
	31	-51.482		31	-65.818
	32	-40.2897		32	-52.2716
	33	-31.0606		33	-40.9546
	34	-23.5464		34	-31.6068
	35	-17.5127		35	-23.9842
	36	-12.7406		36	-17.8546
	37	-9.0314		37	-13.0007
	38	-6.2074		38	-9.2241
	39	-4.1099		39	-6.3461
	40	-2.5981		40	-4.2066
	41	-1.5485		41	-2.6633
	42	-0.8537		42	-1.5907
	43	-0.4218		43	-0.8796
	44	-0.1756		44	-0.4367
	45	-0.0519		45	-0.1834
	46	-0.0016		46	-0.0553
				47	-0.0026

## Sheet: Si+-Kr
Using theextrapolated basis set (EBS) RCCSD(T) potentials for 2Pi1/2, 2Pi3/2 and 2Sig1/2
Vibrational level energy given in cm-1
	2Pi1/2			2Pi3/2			2Sig1/2
	v	E(v) / cm-1		v	E(v) / cm-1		v	E(v) / cm-1
	0	-4145.7		0	-4199.53		0	-625.361
	1	-3966.07		1	-4020.66		1	-573.068
	2	-3790.28		2	-3845.62		2	-523.187
	3	-3618.35		3	-3674.41		3	-475.762
	4	-3450.29		4	-3507.08		4	-430.845
	5	-3286.16		5	-3343.65		5	-388.478
	6	-3125.99		6	-3184.16		6	-348.696
	7	-2969.79		7	-3028.63		7	-311.531
	8	-2817.61		8	-2877.09		8	-276.985
	9	-2669.47		9	-2729.57		9	-245.051
	10	-2525.41		10	-2586.09		10	-215.689
	11	-2385.45		11	-2446.69		11	-188.847
	12	-2249.61		12	-2311.37		12	-164.449
	13	-2117.93		13	-2180.17		13	-142.398
	14	-1990.43		14	-2053.1		14	-122.585
	15	-1867.13		15	-1930.18		15	-104.882
	16	-1748.06		16	-1811.43		16	-89.1562
	17	-1633.24		17	-1696.85		17	-75.2668
	18	-1522.69		18	-1586.46		18	-63.0705
	19	-1416.44		19	-1480.27		19	-52.4272
	20	-1314.5		20	-1378.28		20	-43.2722
	21	-1216.89		21	-1280.49		21	-35.8467
	22	-1123.62		22	-1186.9		22	-29.6208
	23	-1034.71		23	-1097.49		23	-23.9291
	24	-950.165		24	-1012.26		24	-19.174
	25	-870.006		25	-931.196		25	-15.118
	26	-794.221		26	-854.272		26	-11.6896
	27	-722.778		27	-781.437		27	-8.8956
	28	-655.657		28	-712.659		28	-6.6468
	29	-592.827		29	-647.904		29	-4.8554
	30	-534.224		30	-587.123		30	-3.4516
	31	-479.761		31	-530.254		31	-2.3762
	32	-429.292		32	-477.19		32	-1.5741
	33	-382.707		33	-427.845		33	-0.9947
	34	-339.868		34	-382.149		34	-0.5906
	35	-300.614		35	-339.979		35	-0.3273
	36	-264.789		36	-301.231		36	-0.1624
	37	-232.222		37	-265.773		37	-0.0693
	38	-202.741		38	-233.468		38	-0.0237
	39	-176.173		39	-204.171		39	-0.0049
	40	-152.33		40	-177.719
	41	-131.035		41	-153.948
	42	-112.102		42	-132.683
	43	-95.3499		43	-113.751
	44	-80.6023		44	-96.9789
	45	-67.6871		45	-82.1939
	46	-56.4372		46	-69.2314
	47	-46.6936		47	-57.9258
	48	-38.3078		48	-48.0639
	49	-31.1371		49	-39.2289
	50	-25.0425		50	-31.2976
	51	-19.9098		51	-25.0088
	52	-15.6235		52	-19.6273
	53	-12.0811		53	-15.3623
	54	-9.1869		54	-11.8327
	55	-6.8534		55	-8.9468
	56	-5.0005		56	-6.6388
	57	-3.5548		57	-4.8222
	58	-2.4503		58	-3.4144
	59	-1.627		59	-2.344
	60	-1.0318		60	-1.5493
	61	-0.6159		61	-0.9768
	62	-0.343		62	-0.5789
	63	-0.1716		63	-0.3194
	64	-0.0743		64	-0.1575
	65	-0.0257		65	-0.0666
	66	-0.0055		66	-0.0221
				67	-0.0041

[truncated: 2 more sheets: Si+-Xe, Si+-Rn]
